# Supplementary material for: Diverse Secondary Metabolites from the Coral-Derived Fungus Aspergillus hiratsukae SCSIO 5Bn1003
Source: MDPI journal article supplement (doi:10.3390/md20020150), 2022-02-18
Supplement: s1 [file s1]

# Diverse Secondary Metabolites from the Coral-Derived Fungus *Aspergillus hiratsukae* SCSIO 5Bn1003

Qi Zeng <sup>1,2</sup>, Yuchan Chen <sup>3</sup>, Junfeng Wang <sup>1</sup>, Xuefeng Shi <sup>1</sup>, Yihao Che <sup>1,2</sup>, Xiayu Chen <sup>1,2</sup>, Weimao Zhong <sup>1</sup>, Weimin Zhang <sup>3</sup>, Xiaoyi Wei <sup>4</sup>, Fazuo Wang <sup>1,\*</sup> and Si Zhang <sup>1,\*</sup>

- <sup>1</sup> CAS Key Laboratory of Tropical Marine Bio-Resources and Ecology, Southern Marine Science and Engineering Guangdong Laboratory (Guangzhou), Guangdong Key Laboratory of Marine Materia Medica, RNAM Center for Marine Microbiology, South China Sea Institute of Oceanology, Chinese Academy of Sciences, 164 West Xingang Road, Guangzhou 510301, China; zengqi15@mailsucas.ac.cn (Q.Z.); wangjunfeng@scsio.ac.cn (J.W.); shixuefeng@scsio.ac.cn (X.S.); cheyihao1995@163.com (Y.C.); chenxiayu17@mailsucas.ac.cn (X.C.); wmzhong@scsio.ac.cn (W.Z.)
- <sup>2</sup> University of Chinese Academy of Sciences, 19 Yuquan Road, Beijing 100049, China
- <sup>3</sup> State Key Laboratory of Applied Microbiology Southern China, Guangdong Provincial Key Laboratory of Microbial Culture Collection and Application, Institute of Microbiology, Guangdong Academy of Sciences, 100 Central Xianlie Road, Guangzhou 510070, China; chenyc@gdim.cn (Y.C.); wmzhang@gdim.cn (W.Z.)
- <sup>4</sup> Key Laboratory of Plant Resources Conservation and Sustainable Utilization, South China Botanical Garden, Chinese Academy of Sciences, Guangzhou 510650, China; wxy@scbg.ac.cn
- \* Correspondence: wangfazuo@scsio.ac.cn (F.W.); zhsimd@scsio.ac.cn (S.Z.)

## List of Supporting Information

|                                                                                                                             |    |
|-----------------------------------------------------------------------------------------------------------------------------|----|
| <b>Figure S1.</b> $^1\text{H}$ NMR Spectrum of <b>1</b> .....                                                               | 3  |
| <b>Figure S2.</b> $^{13}\text{C}$ and DEPT NMR Spectrum of <b>1</b> .....                                                   | 3  |
| <b>Figure S3.</b> $^1\text{H}$ - $^1\text{H}$ COSY Spectrum of <b>1</b> .....                                               | 4  |
| <b>Figure S4.</b> HSQC Spectrum of <b>1</b> .....                                                                           | 4  |
| <b>Figure S5.</b> HMBC Spectrum of <b>1</b> .....                                                                           | 5  |
| <b>Figure S6.</b> HRESIMS Spectrum of <b>1</b> .....                                                                        | 6  |
| <b>Figure S7.</b> UV Spectrum of <b>1</b> .....                                                                             | 6  |
| <b>Figure S8.</b> UPLC-MS analysis of the acid hydrolysate of <b>1</b> .....                                                | 7  |
| <b>Figure S9.</b> $^1\text{H}$ NMR Spectrum of <b>2</b> .....                                                               | 8  |
| <b>Figure S10.</b> $^{13}\text{C}$ and DEPT NMR Spectrum of <b>2</b> .....                                                  | 8  |
| <b>Figure S11.</b> $^1\text{H}$ - $^1\text{H}$ COSY Spectrum of <b>2</b> .....                                              | 9  |
| <b>Figure S12.</b> HSQC Spectrum of <b>2</b> .....                                                                          | 9  |
| <b>Figure S13.</b> HMBC Spectrum of <b>2</b> .....                                                                          | 10 |
| <b>Figure S14.</b> NOESY Spectrum of <b>2</b> .....                                                                         | 10 |
| <b>Figure S15.</b> HRESIMS Spectrum of <b>2</b> .....                                                                       | 11 |
| <b>Figure S16.</b> UV Spectrum of <b>2</b> .....                                                                            | 12 |
| <b>Figure S17.</b> $^1\text{H}$ NMR Spectrum of <b>3</b> .....                                                              | 12 |
| <b>Figure S18.</b> $^{13}\text{C}$ and DEPT NMR Spectrum of <b>3</b> .....                                                  | 13 |
| <b>Figure S19.</b> $^1\text{H}$ - $^1\text{H}$ COSY Spectrum of <b>3</b> .....                                              | 13 |
| <b>Figure S20.</b> HSQC Spectrum of <b>3</b> .....                                                                          | 14 |
| <b>Figure S21.</b> HMBC Spectrum of <b>3</b> .....                                                                          | 14 |
| <b>Figure S22.</b> NOESY Spectrum of <b>3</b> .....                                                                         | 15 |
| <b>Figure S23.</b> HRESIMS Spectrum of <b>3</b> .....                                                                       | 15 |
| <b>Figure S24.</b> UV Spectrum of <b>3</b> .....                                                                            | 16 |
| <b>The ECD computational detail of compound 3</b> .....                                                                     | 16 |
| <b>The physicochemical data of the known compounds</b> .....                                                                | 17 |
| <b>The strain's (<i>Aspergillus hiratsukae</i> SCSIO 5Bn1003) ITS sequence of the rDNA</b> .....                            | 20 |
| <b>Table S1.</b> The primary screening of cytotoxic activity of all compounds.....                                          | 20 |
| <b>Table S2.</b> The primary screening of antibacterial activity of all compounds.....                                      | 21 |
| <b>Table S3.</b> The primary screening of antioxidative and $\alpha$ -glucosidase inhibitory activity of all compounds..... | 21 |

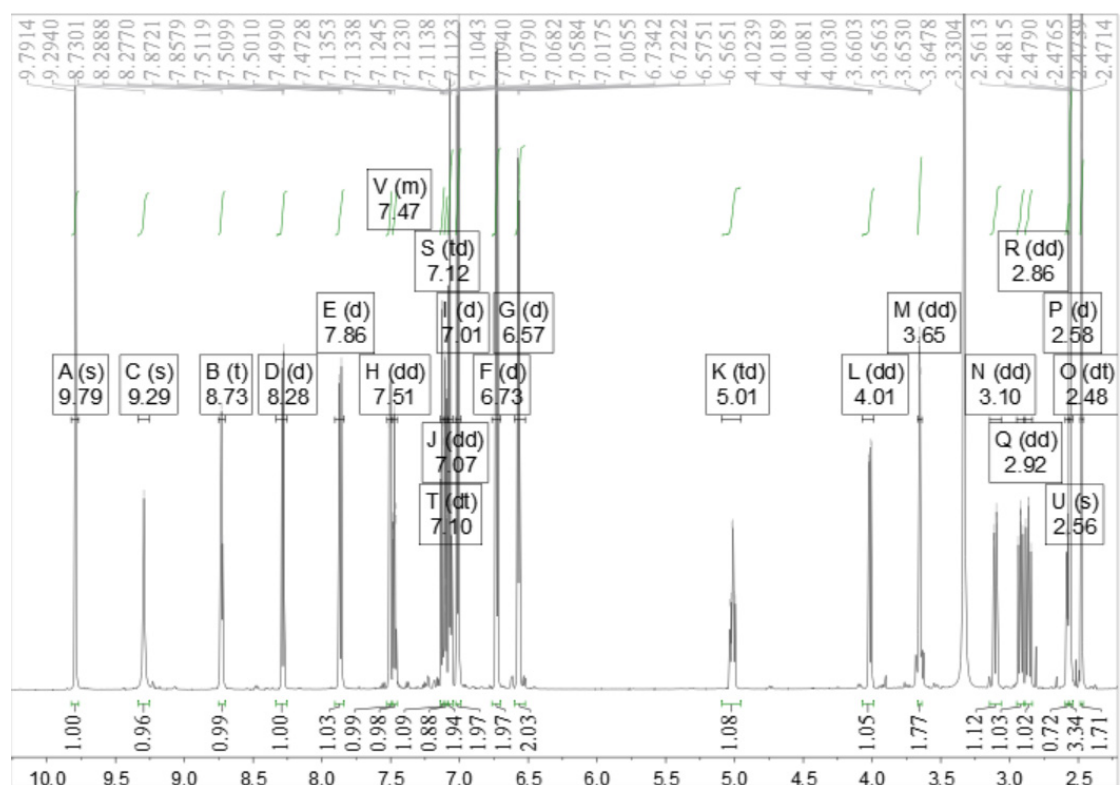

**Figure S1.  $^1\text{H}$  NMR spectrum of asperhiratide (1).**

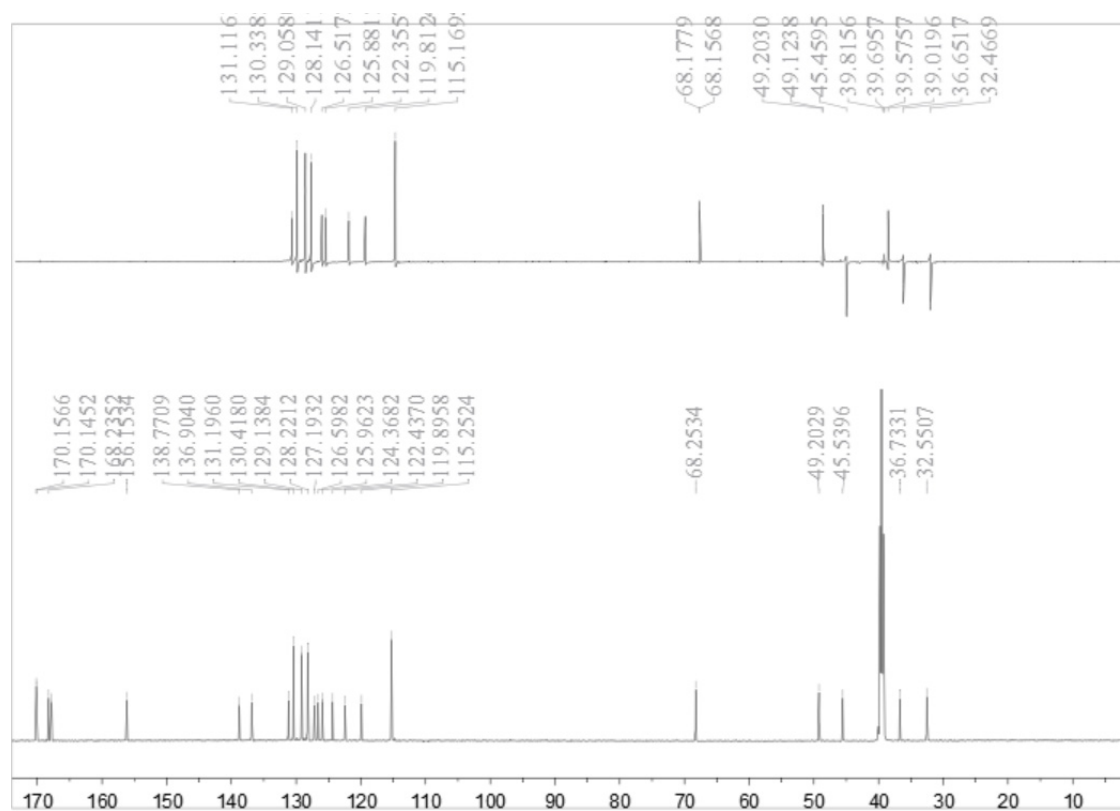

**Figure S2.  $^{13}\text{C}$  NMR and DEPT spectrum of asperhiratide (1).**

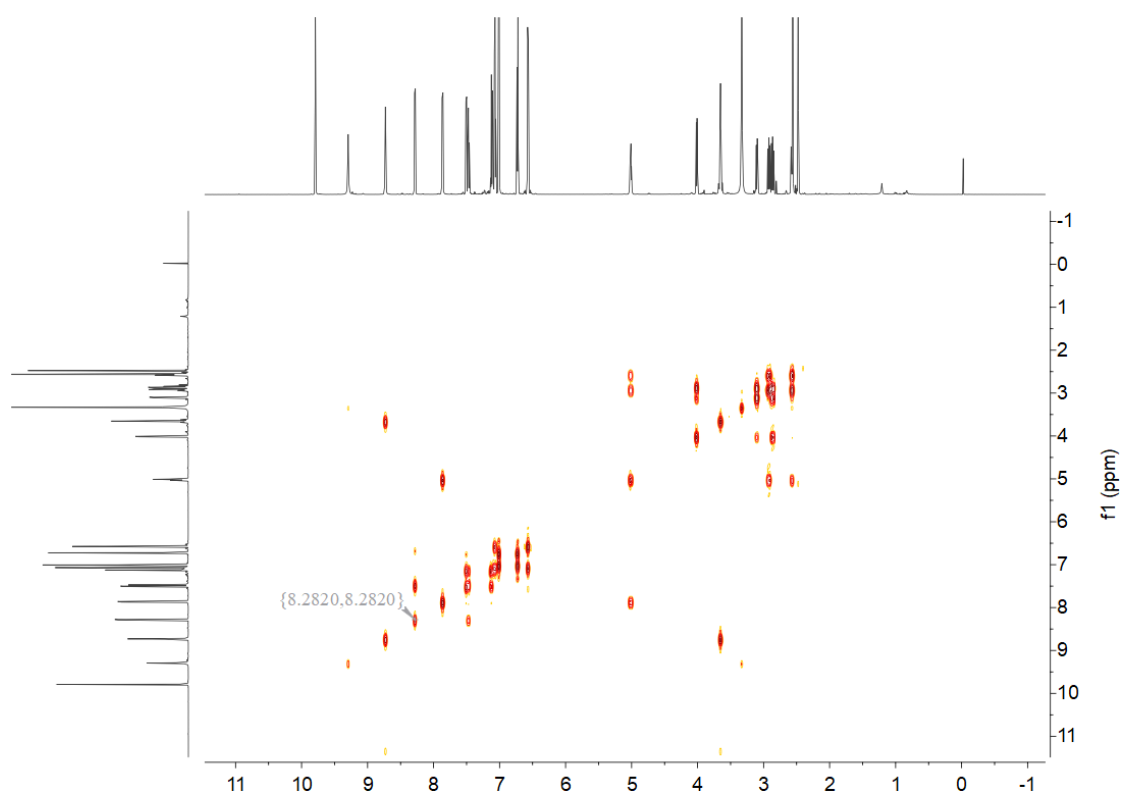

**Figure S3.** COSY spectrum of asperhiratide (1).

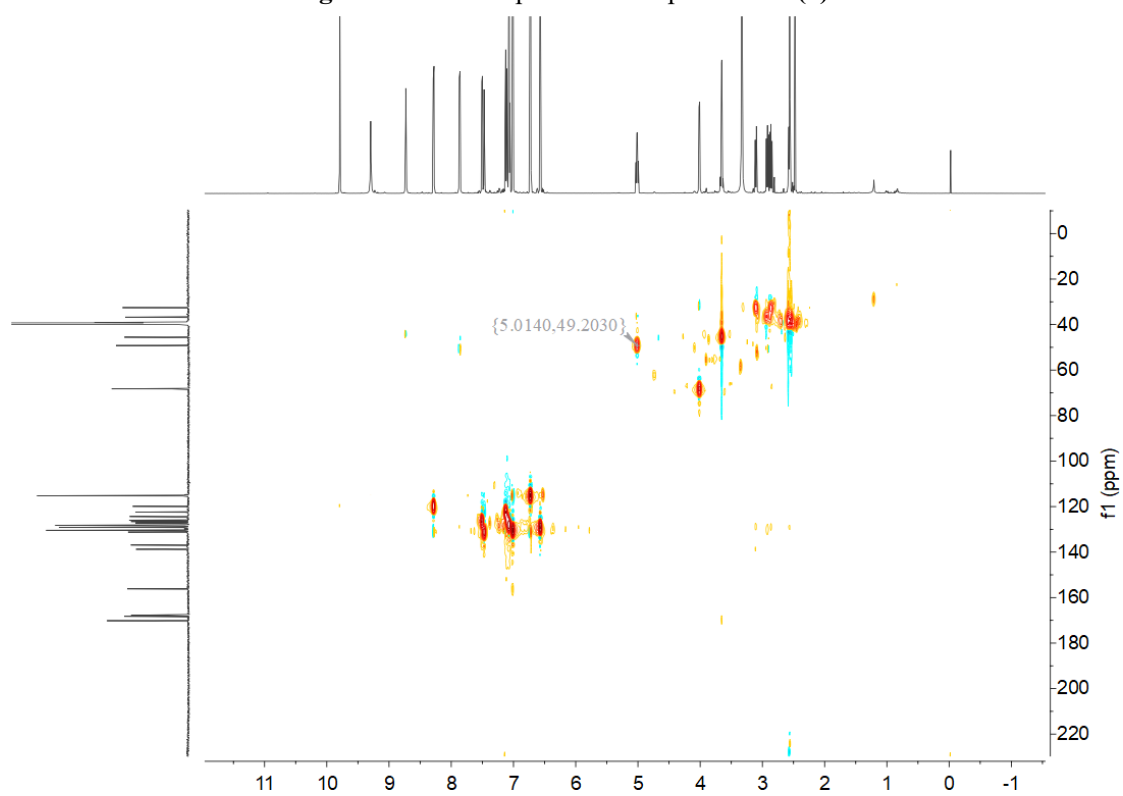

**Figure S4.** HSQC spectrum of asperhiratide (1).

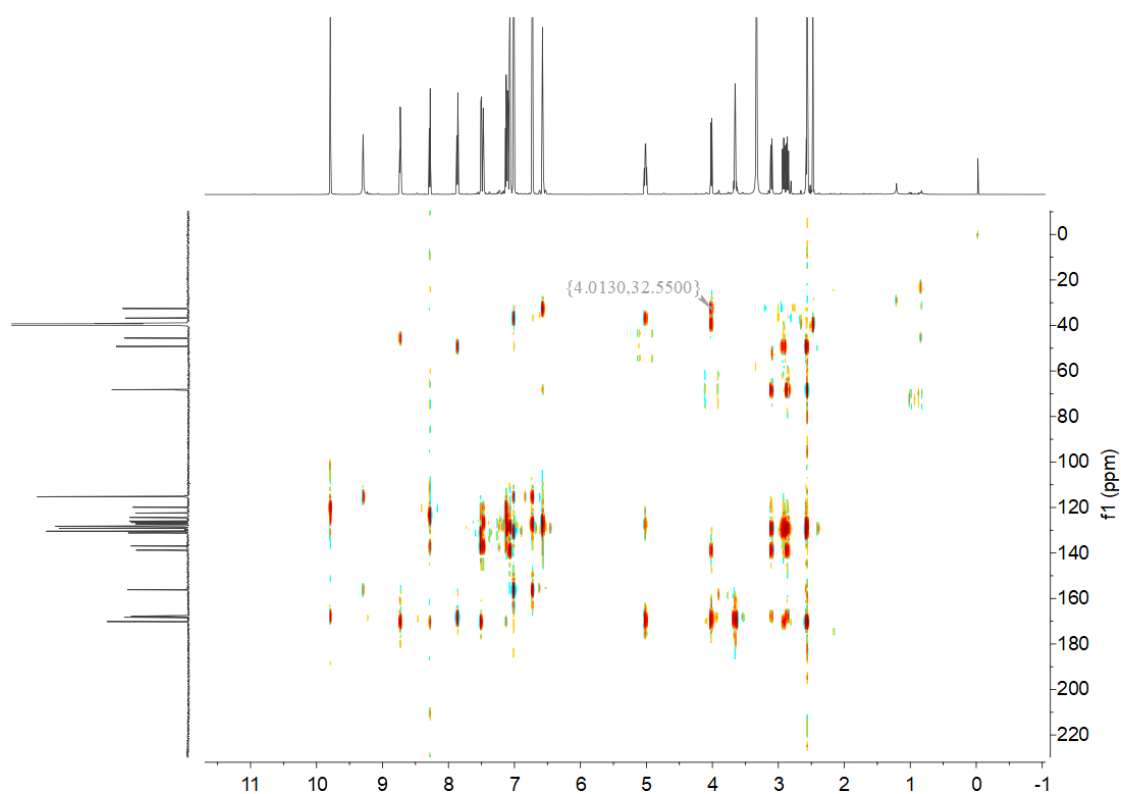

Figure S5. HMBC spectrum of asperhiratide (1).

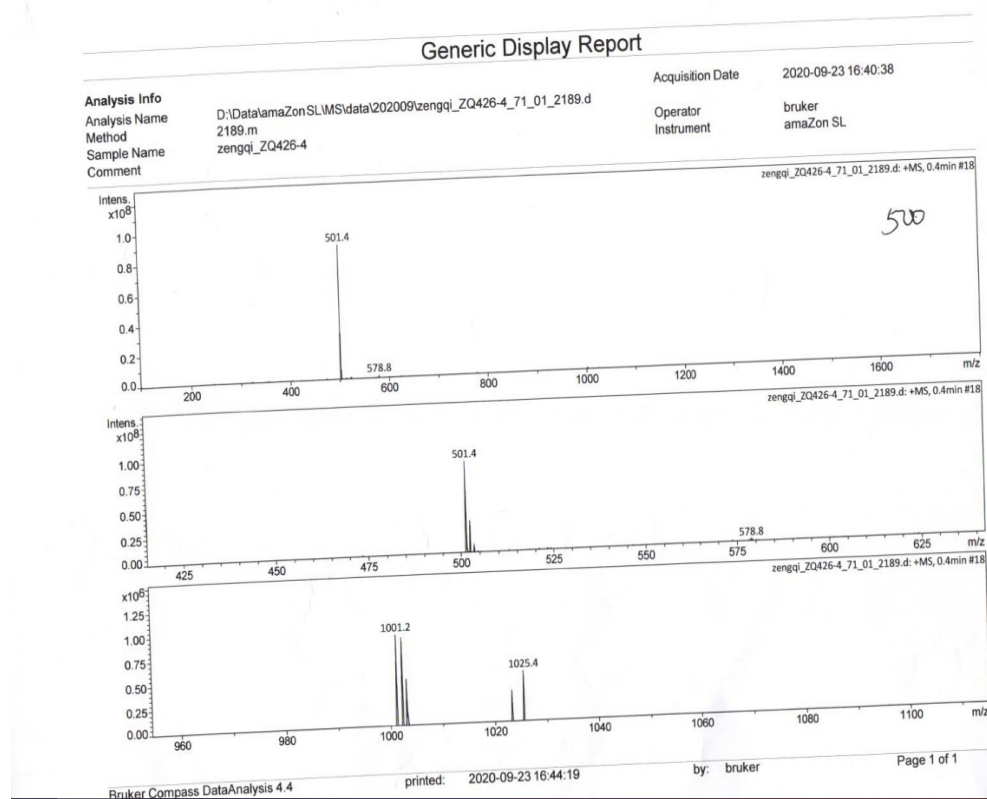

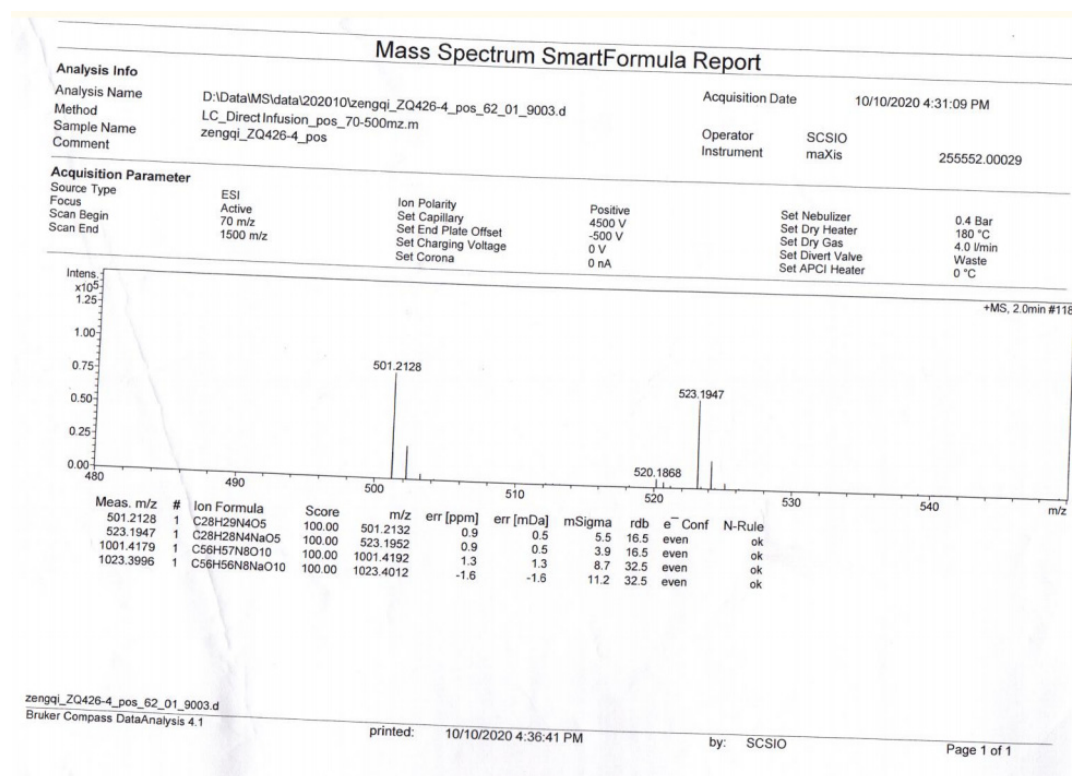

**Figure S6. HRESIMS spectrum of asperhiratide (1).**

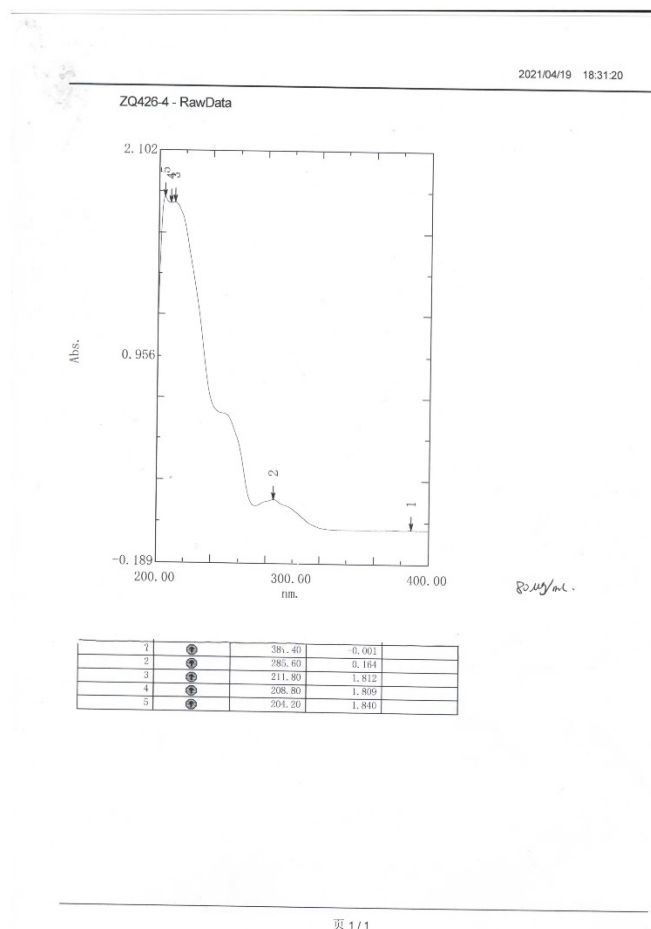

**Figure S7. UV spectrum of asperhiratide (1) (MeOH).**

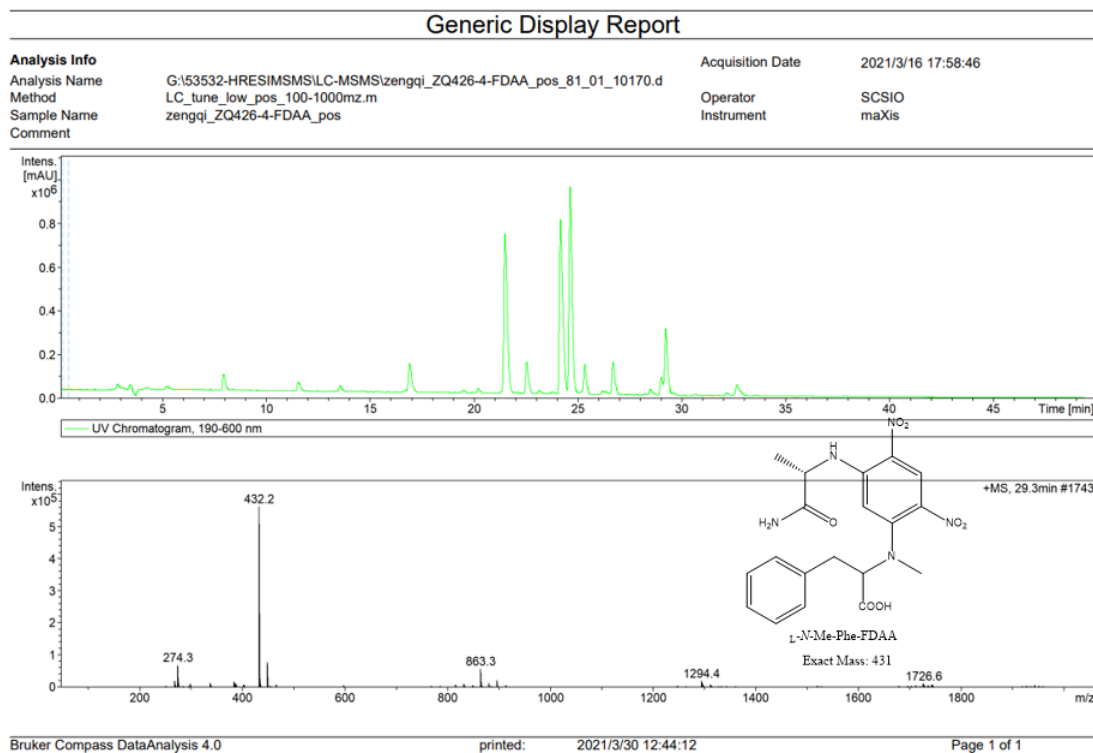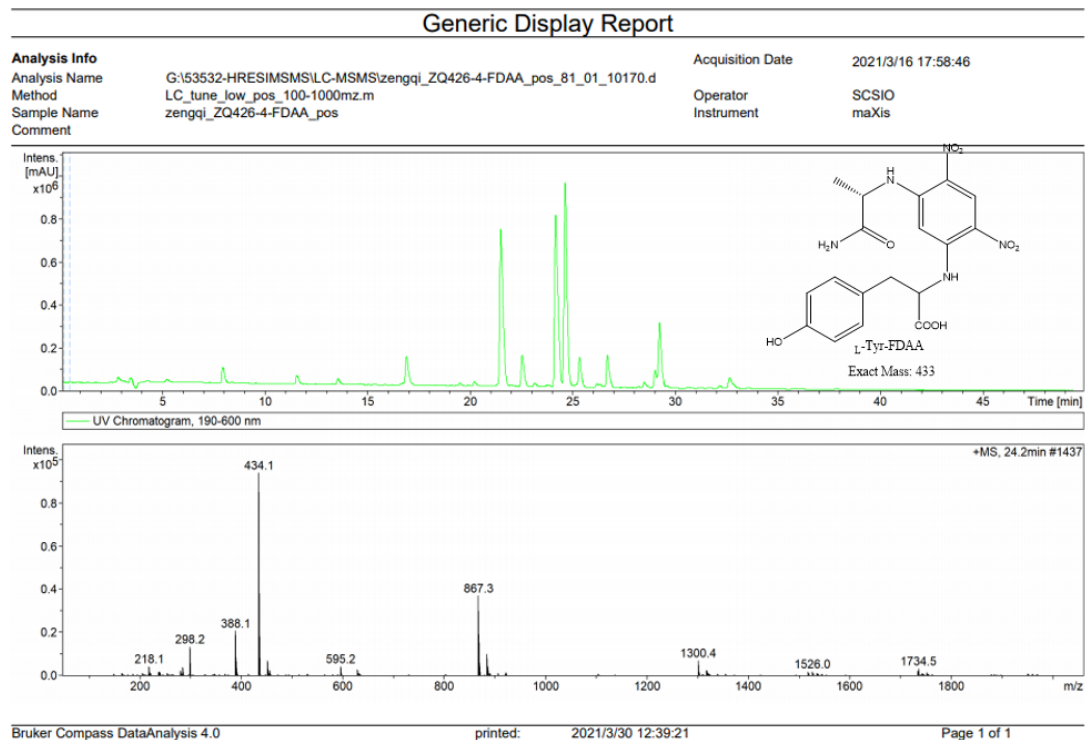

**Figure S8.** UPLC-MS analysis of the acid hydrolysate of asperhiratide (1).

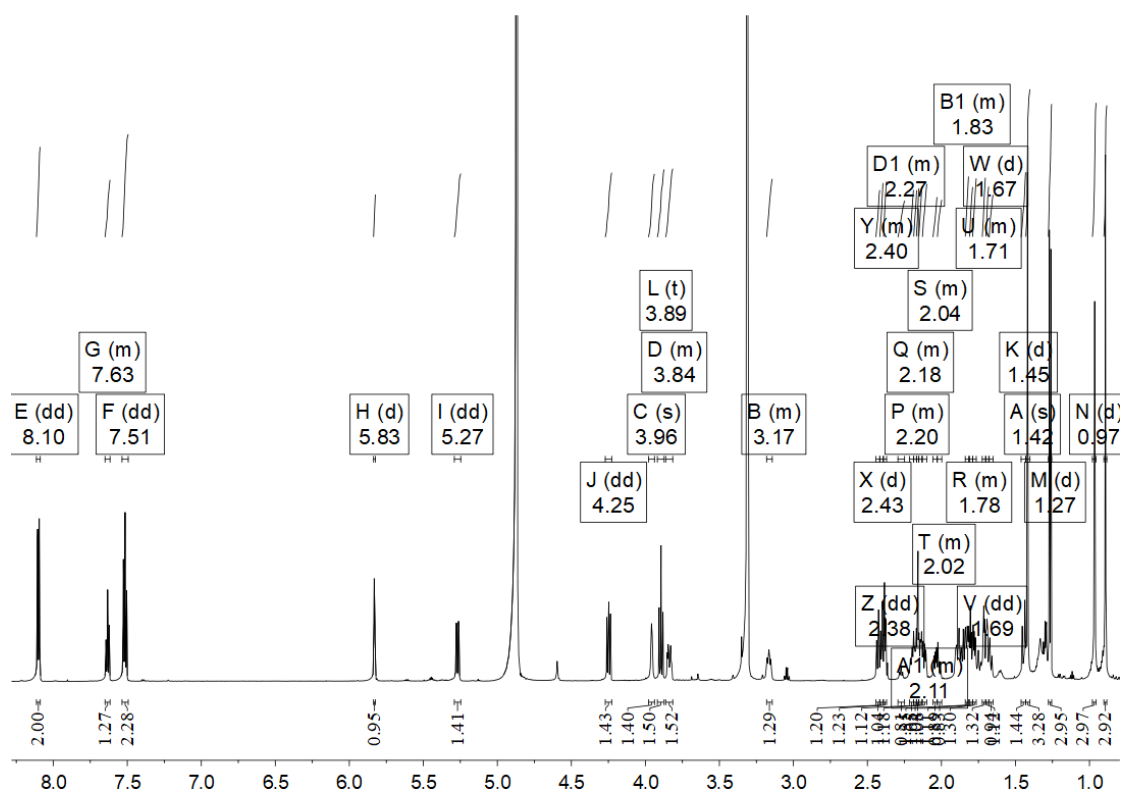

Figure S9.  $^1\text{H}$  NMR spectrum of asperhiratine (2).

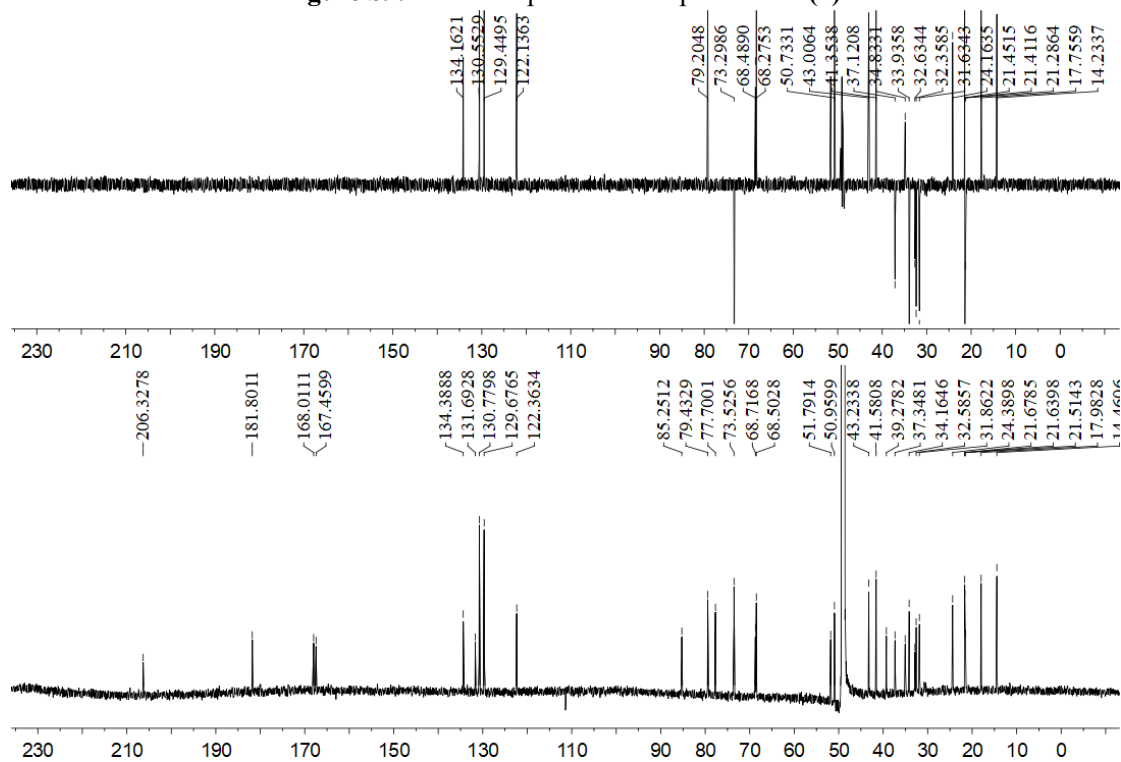

Figure S10.  $^{13}\text{C}$  NMR and DEPT spectrum of asperhiratine (2).



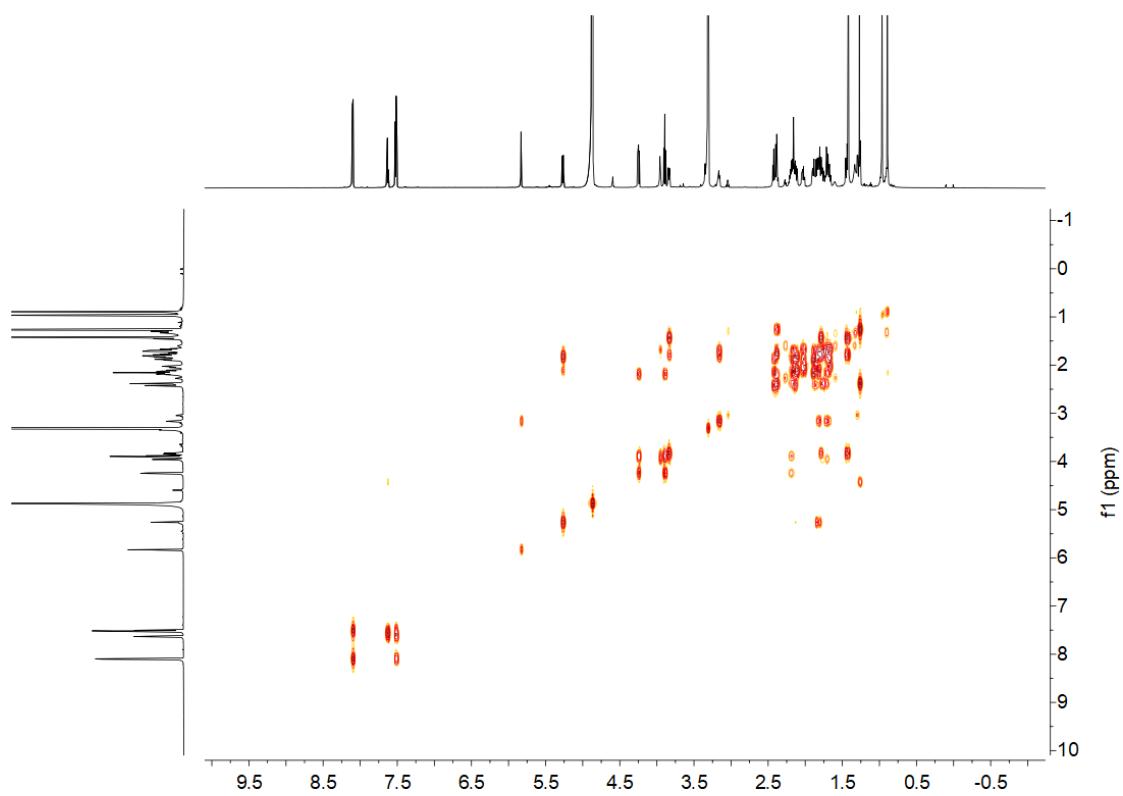

**Figure S11.** COSY spectrum of asperhiratine (**2**).

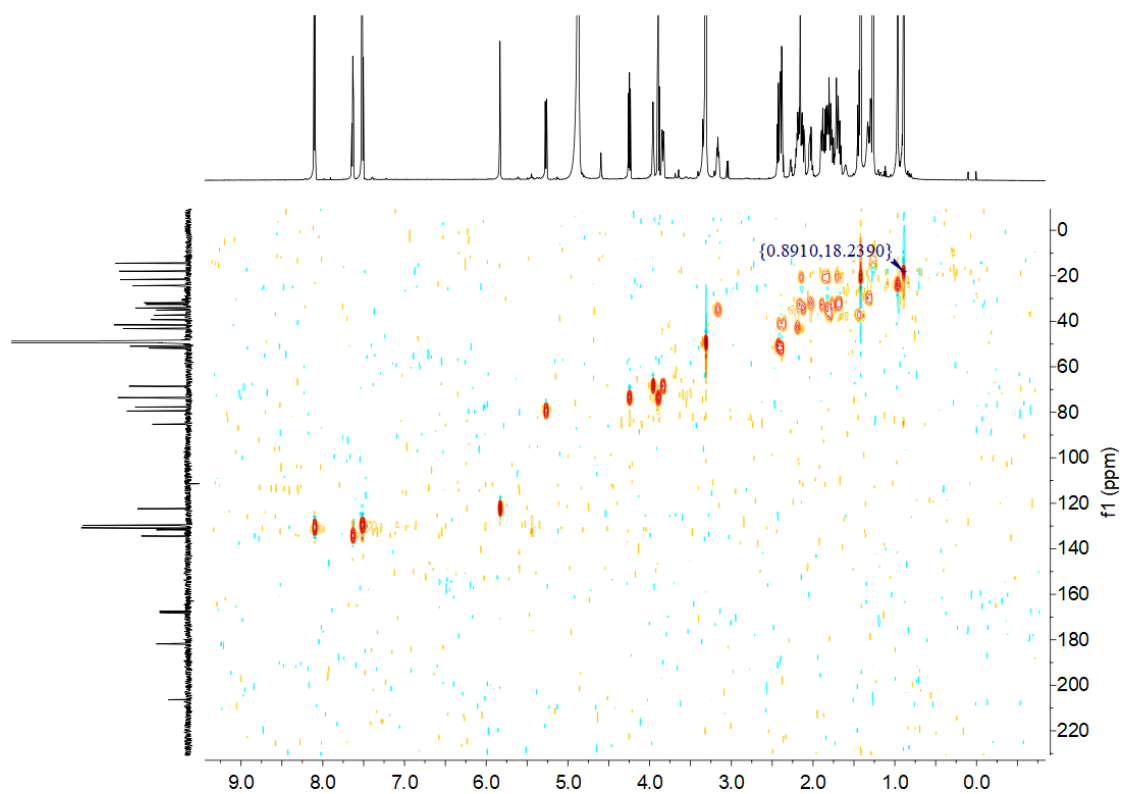

**Figure S12.** HSQC spectrum of asperhiratine (**2**).

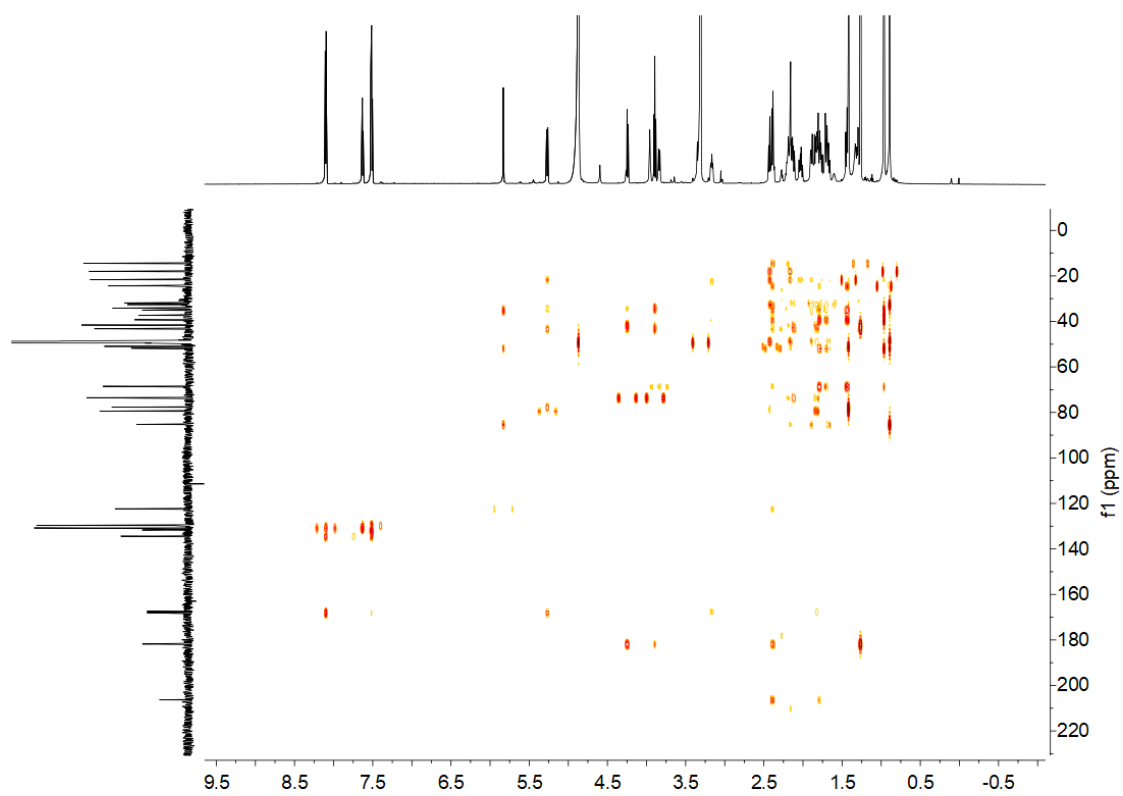

**Figure S13.** HMBC spectrum of asperhiratine (**2**).

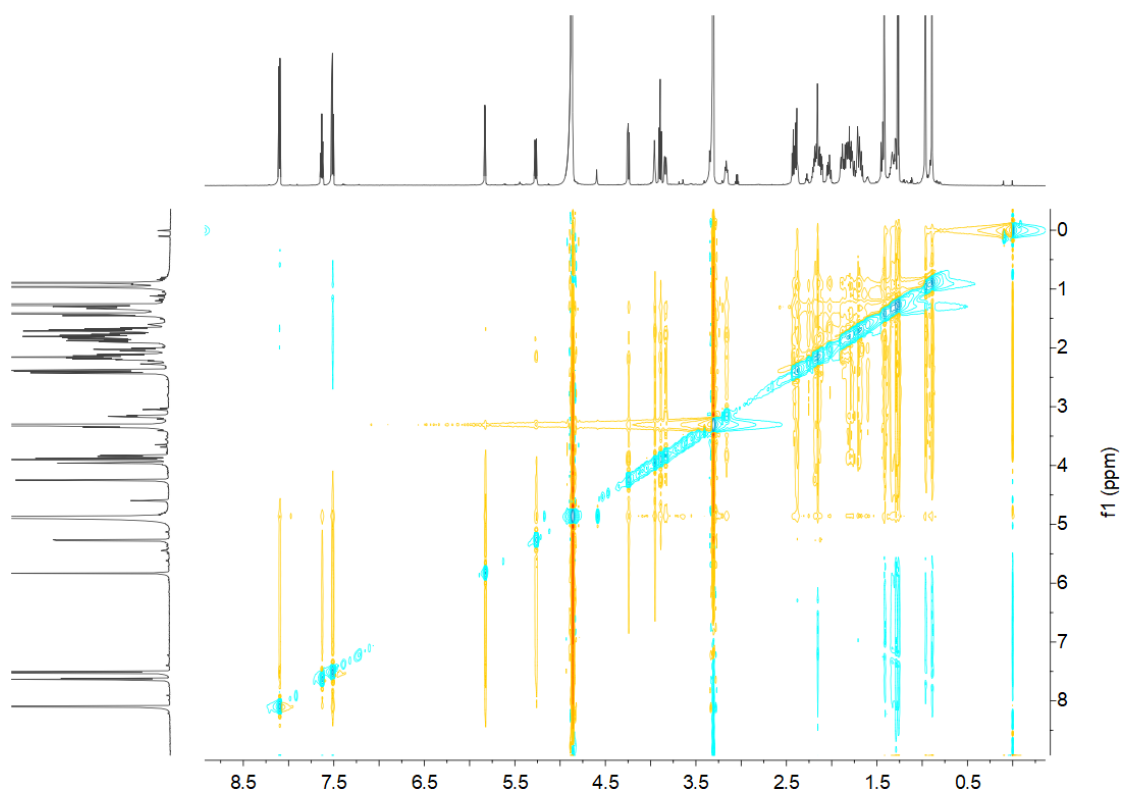

**Figure S14.** NOESY spectrum of asperhiratine (**2**).

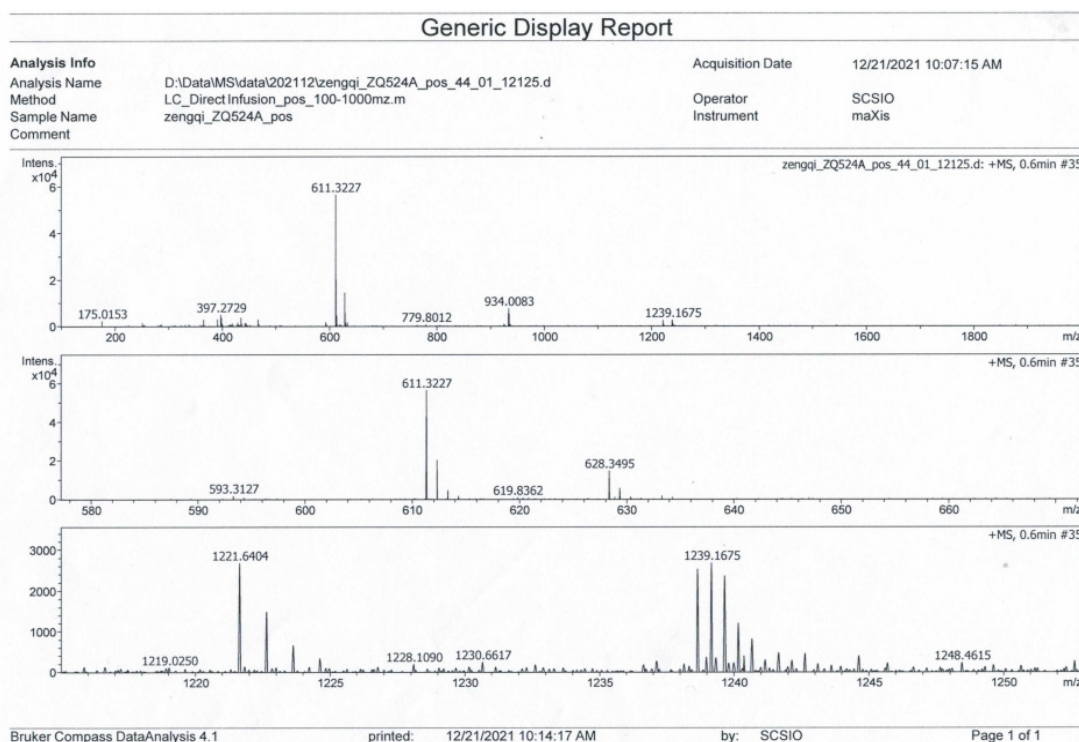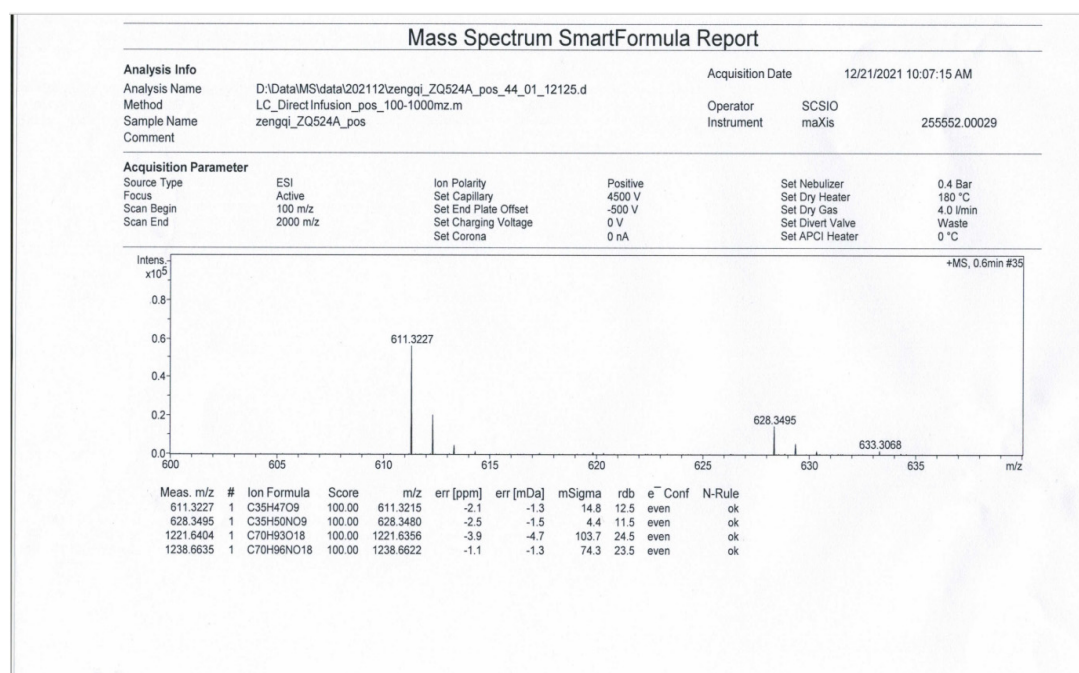

**Figure S15.** HRESIMS spectrum of asperhiratine (**2**).

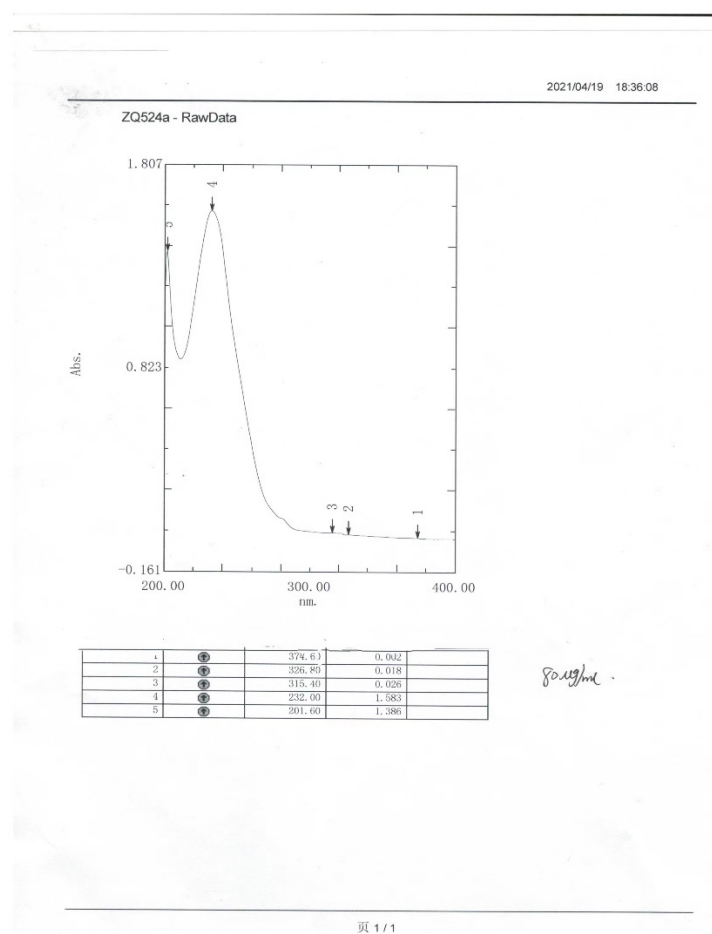

**Figure S16.** UV spectrum of asperhiratine (2).

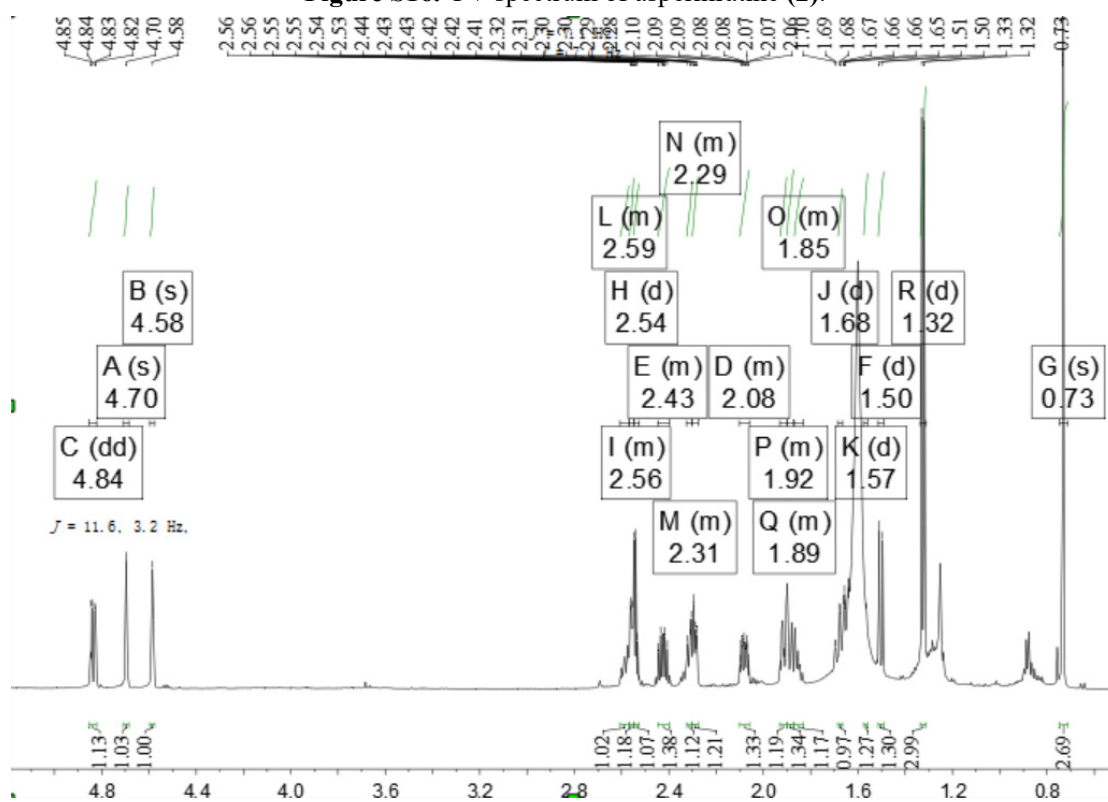

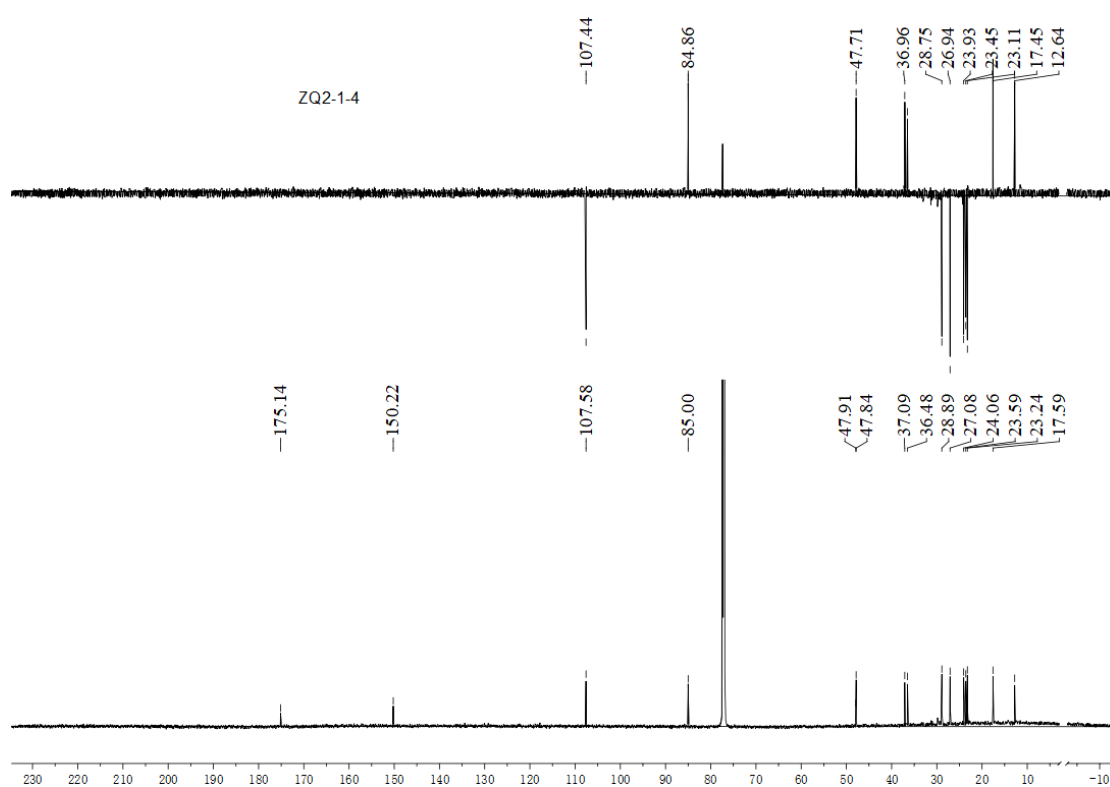

**Figure S18.  $^{13}\text{C}$  NMR and DEPT spectrum of asperhiratone (3).**

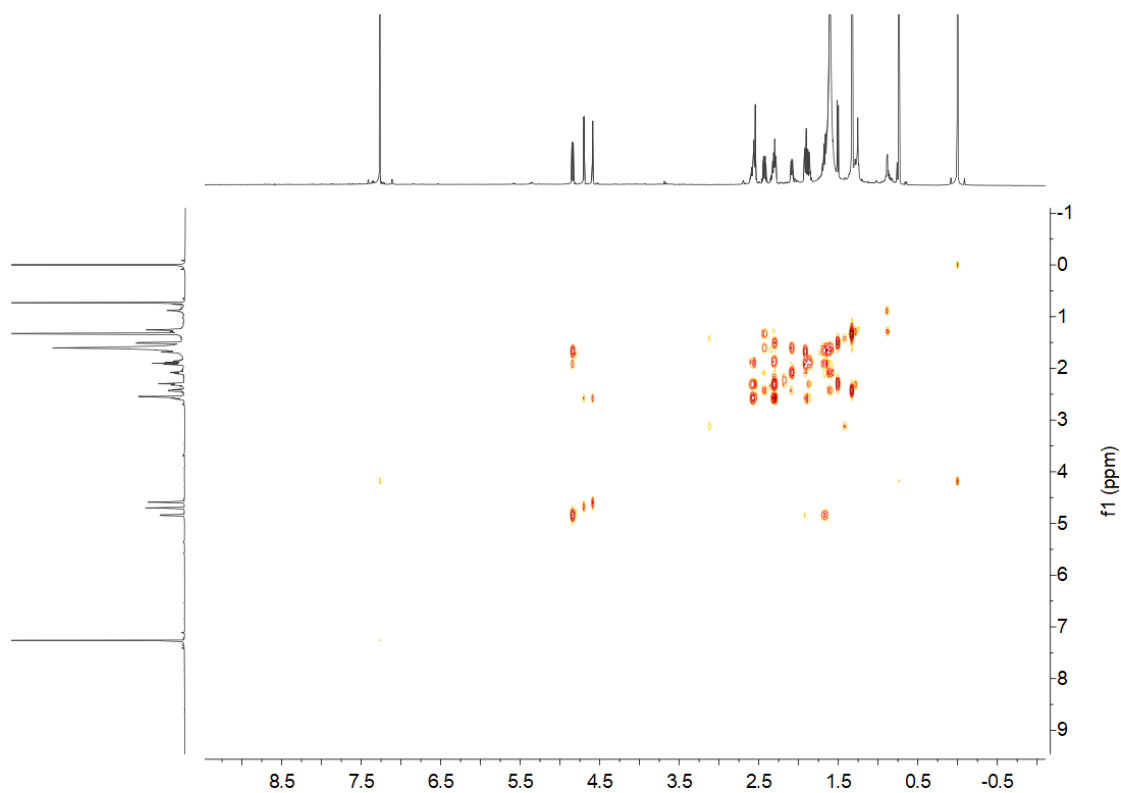

**Figure S19.  $^1\text{H}$  -  $^1\text{H}$  COSY spectrum of asperhiratone (3).**

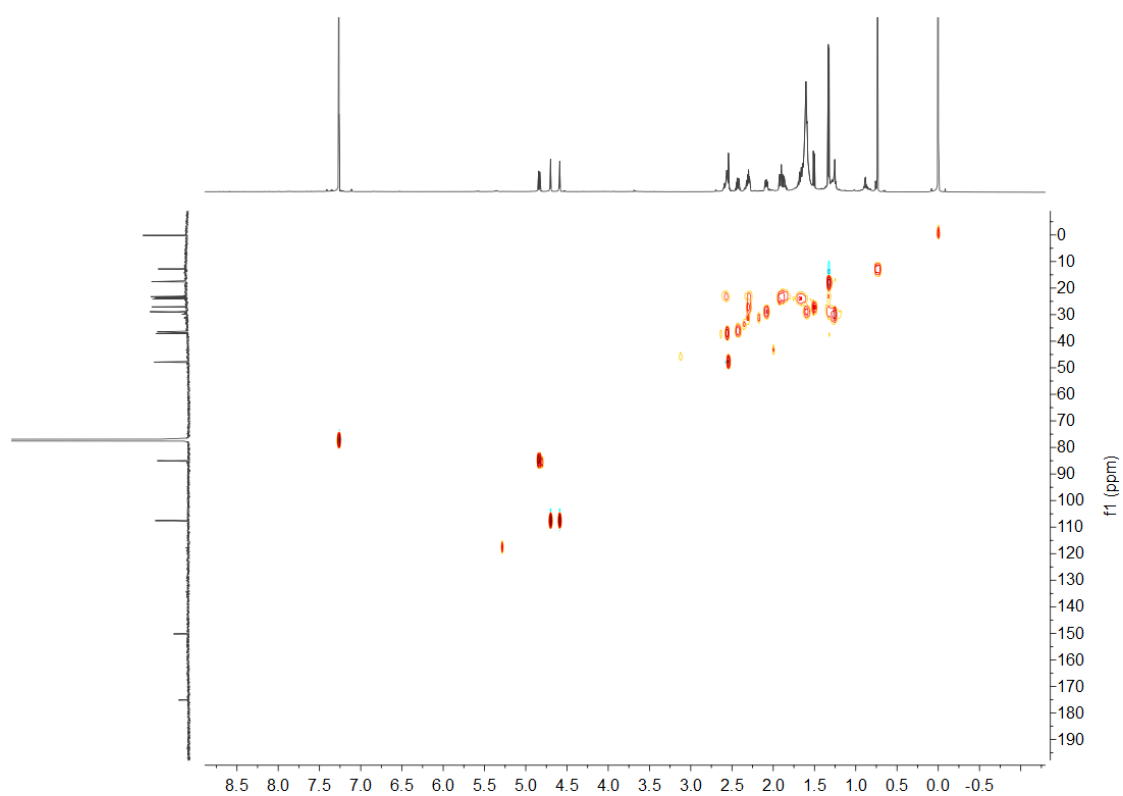

**Figure S20.** HSQC spectrum of asperhiratone (**3**).

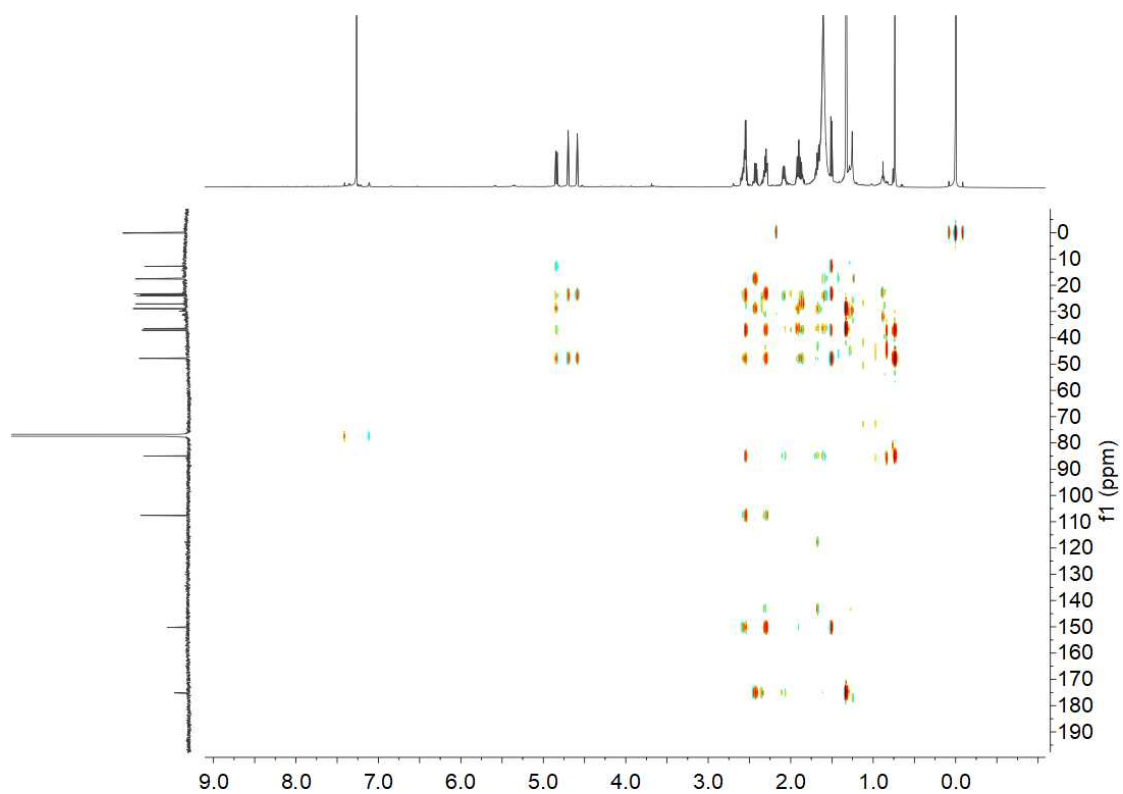

**Figure S21.** HMBC spectrum of asperhiratone (**3**).

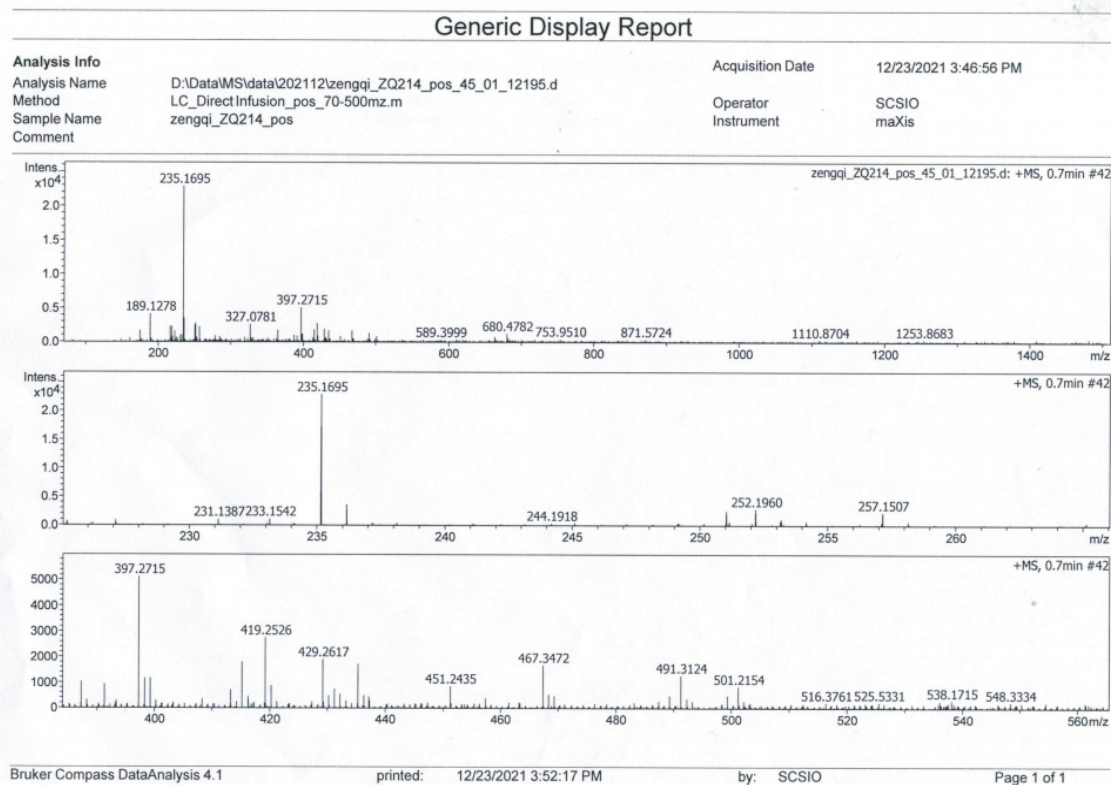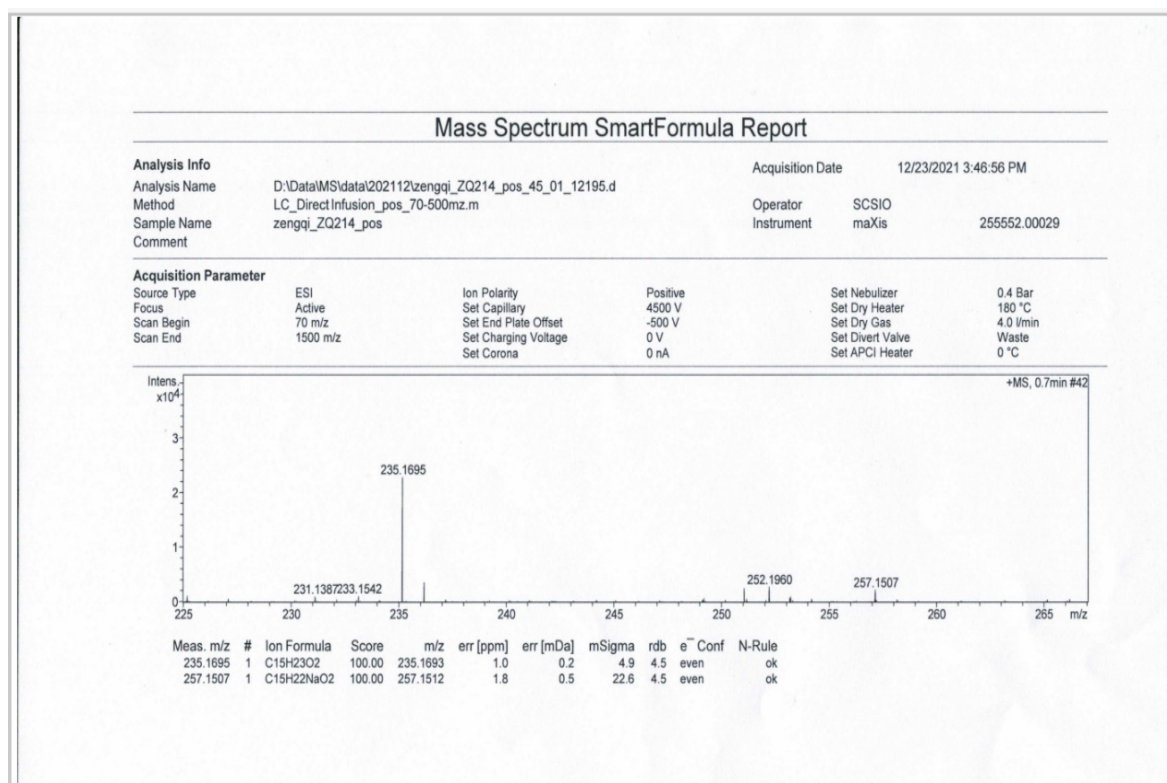

**Figure S22.** HRESIMS spectrum of asperhiratone (3).



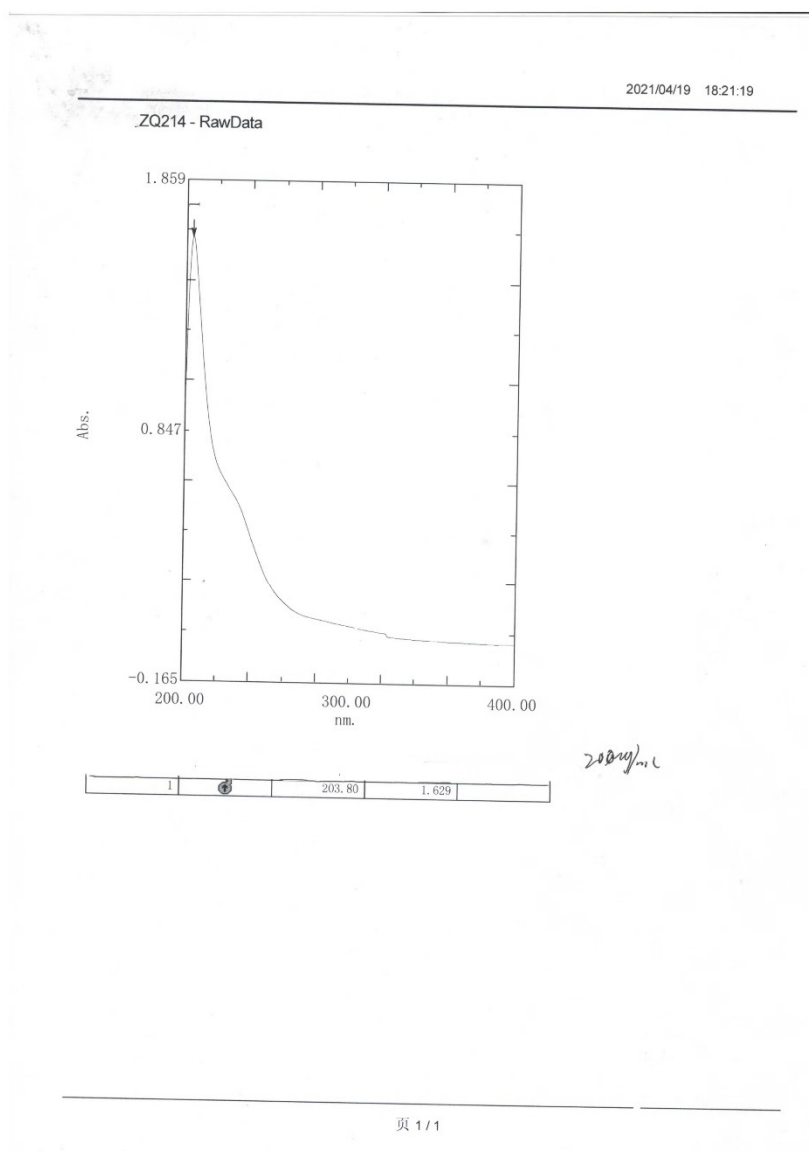

**Figure S23.** UV spectrum of asperhiratone (**3**).

### **The ECD computational detail of compound **3****

Conformational searches were done using Molecular Merck force field (MMFF) embedded in Spartan'14 software (Wavefunction Inc., Irvine, CA, USA). Density functional theory (DFT) and time-dependent density functional theory (TDDFT) calculations were performed with Gaussian09 RevD.01. [26]. Double-hybrid (DH) DFT calculations were conducted with ORCA 4.2.1 program package using RIJK approximation, tight SCF criteria, and grid 6 integrity [27]. For simulations of ECD spectrum of compound **3**, low-energy conformers of (1R,2S,6S,10R,13S)- and (1R,2S,6S,10S,13R)-**3** within a 10 kcal/mol energy window from MMFF conformational search were subjected to geometry optimizations followed by frequency calculations using DFT method at the B3LYP [28,29] /Def2-SVP [30] level of theory with the solvent model PCM for MeOH. The



high level of single point calculations of the optimized low-energy conformers was carried out using the DH-DFT method at the PWPB95 [31] -D3BJ [32,33] / def2-QZVPP[29]. level with the SMD [34] solvent model for MeOH. The TDDFT calculations were carried out using PBE1PBE (PBE0) [35] , M06 [36] and M06-2X [37] functionals in combination with the TZVP [38]. basis set and the PCM solvent (MeOH) model. The number of excited states was 20 for all conformers. The results were visualized and exported using the SpecDis program [39]. The calculated ECD spectra of the two stereoisomers were generated as a sum of Gaussian curve with the  $\sigma$  value of 0.27 eV using rotatory strengths computed in the dipole-velocity gauge from ECD data of the individual low-energy conformers. Boltzmann distributions of the conformers in equilibrium population were estimated from the relative Gibbs free energies ( $\Delta G$ ) at 298.15K.

### The physicochemical data of the known compounds

**schizaeasterone A (4):** white powder; LRESIMS  $[M+H]^+$   $m/z$  463.1.  $[\alpha]^{25}_D$  +64.3 (c 0.1 MeOH).  $^1H$  NMR (700 MHz, DMSO):  $\delta_H$  1.56 (1H, m, H-1a), 1.31 (1H, d,  $J=11.3$ Hz, H-1b), 1.72 (1H, d,  $J=4.6$ Hz, H-2a), 1.45 (1H, d,  $J=4.9$ Hz, H-2b), 3.40 (1H, dd,  $J=10.8, 4.4$ Hz, H-3), 1.70 (1H, m, H-4a), 1.51 (1H, m, H-4b), 1.89 (1H, d,  $J=3.3$ Hz, H-5), 5.62 (1H, d,  $J=2.4$ Hz, H-7), 1.87 (1H, d,  $J=4.1$ Hz, H-9), 1.45 (1H, d,  $J=4.5$  Hz, H-11a), 1.56 (1H, m, H-11b), 1.69 (1H, m, H-12a), 2.20 (1H, m, H-12b), 1.77 (1H, m, H-15a), 1.53 (1H, d,  $J=8.7$  Hz, H-15b), 1.69 (1H, m, H-16a), 2.20 (1H, m, H-16b), 2.24 (1H, t,  $J=8.7$  Hz, H-17), 0.76 (3H, s, H-18), 0.80 (3H, s, H-19), 1.04 (3H, s, H-21), 3.25 (1H, dd,  $J=8.9, 5.4$  Hz, H-22), 0.97 (1H, dd,  $J=8.2, 4.1$ Hz, H-23a), 1.37 (1H, m, H-23b), 1.59 (1H, m, H-24), 1.23 (1H, m, H-25), 0.73 (3H, d,  $J=6.9$  Hz, H-26), 0.86 (3H, d,  $J=6.9$  Hz, H-27), 0.77 (3H, d,  $J=7.0$  Hz, H-28), 4.73 (1H, s, OH-3), 4.70 (1H, s, OH-14), 3.60 (1H, s, OH-20), 4.29 (1H, s, OH-22),  $^{13}C$  NMR (700 MHz, DMSO):  $\delta_C$  33.2 (CH<sub>2</sub>, C-1),  $\delta_C$  30.5 (CH<sub>2</sub>, C-2),  $\delta_C$  67.9 (CH, C-3),  $\delta_C$  34.3 (CH<sub>2</sub>, C-4),  $\delta_C$  55.9 (CH, C-5),  $\delta_C$  201.3 (qC, C-6),  $\delta_C$  120.2 (CH, C-7),  $\delta_C$  165.6 (qC, C-8),  $\delta_C$  32.7 (CH, C-9),  $\delta_C$  36.0 (qC, C-10),  $\delta_C$  19.8 (CH<sub>2</sub>, C-11),  $\delta_C$  30.9 (CH<sub>2</sub>, C-12),  $\delta_C$  46.9 (qC, C-13),  $\delta_C$  82.9 (qC, C-14),  $\delta_C$  30.3 (CH<sub>2</sub>, C-15),  $\delta_C$  20.3 (CH<sub>2</sub>, C-16),  $\delta_C$  48.6 (CH, C-17),  $\delta_C$  17.1 (CH<sub>3</sub>, C-18),  $\delta_C$  23.2 (CH<sub>3</sub>, C-19),  $\delta_C$  75.7 (qC, C-20),  $\delta_C$  20.7 (CH<sub>3</sub>, C-21),  $\delta_C$  73.4 (CH, C-22),  $\delta_C$  36.2 (CH<sub>2</sub>, C-23),  $\delta_C$  34.9 (CH, C-24),  $\delta_C$  28.7 (CH, C-25),  $\delta_C$  15.8 (CH<sub>3</sub>, C-26),  $\delta_C$  21.0 (CH<sub>3</sub>, C-27),  $\delta_C$  15.4 (CH<sub>3</sub>, C-28)

**terretonin (5):** Orange powder; LRESIMS  $[M+H]^+$   $m/z$  489.2.  $[\alpha]^{25}_D$  -64.3 (c 0.1 MeOH).  $^1H$  NMR (700 MHz, DMSO):  $\delta_H$  1.80 (1H, dd,  $J=11.6, 6.5$  Hz, H-1a), 2.07 (1H, dd,  $J=20.5, 10.3$  Hz, H-1b), 2.67 (1H, d,  $J=19.0, 8.7$ Hz, H-2a), 2.39 (1H, m, H-2b), 2.91 (1H, d,  $J=14.4$  Hz, H-11a), 2.29 (1H, d,  $J=14.6$  Hz, H-11b), 3.68 (1H, s, H-14), 1.58 (3H, s, H-20), 1.33 (3H, s, H-21), 1.35 (3H, s, H-24), 1.78 (3H, s, H-26), 4.94 (1H, s, H-27a), 5.17 (1H, s, H-27b), 1.06 (3H, s, H-28), 1.33 (3H, s, H-30), 3.70 (3H, s, H-34).  $^{13}C$  NMR (700 MHz, DMSO):  $\delta_C$  32.4 (CH<sub>2</sub>, C-1),  $\delta_C$  34.0 (CH<sub>2</sub>, C-2),  $\delta_C$  214.5 (qC, C-3),  $\delta_C$  52.0 (qC, C-4),  $\delta_C$  130.7 (qC, C-5),  $\delta_C$  140.4 (qC, C-6),  $\delta_C$  197.1 (qC, C-7),  $\delta_C$  43.5 (qC, C-8),  $\delta_C$  77.5 (qC, C-9),  $\delta_C$  47.2 (qC, C-10),  $\delta_C$  27.9 (CH<sub>2</sub>, C-11),  $\delta_C$  139.1 (qC, C-12),  $\delta_C$  48.9 (qC, C-13),  $\delta_C$  42.8 (CH, C-14),  $\delta_C$  168.0 (qC, C-15),  $\delta_C$  84.7 (qC, C-17),  $\delta_C$  202.5 (qC, C-18),  $\delta_C$  21.2 (CH<sub>3</sub>, C-20),  $\delta_C$  23.8 (CH<sub>3</sub>, C-21),  $\delta_C$  21.3 (CH<sub>3</sub>, C-24),  $\delta_C$  18.6 (CH<sub>3</sub>, C-26),  $\delta_C$  113.9 (CH<sub>2</sub>, C-27),  $\delta_C$  18.2 (CH<sub>3</sub>, C-28),  $\delta_C$  23.1 (CH<sub>3</sub>, C-30),  $\delta_C$  167.8 (qC, C-31),  $\delta_C$  53.5 (CH<sub>3</sub>, C-34)

**demethylincisterol A2 (6):** Orange powder; LRESIMS  $[M+H]^+$   $m/z$  333.6.  $[\alpha]^{25}_D +10.3$  (c 0.2 MeOH).  $^1H$  NMR (700 MHz,  $CDCl_3$ ):  $\delta_H$  5.64 (1H, d,  $J=1.7$  Hz, H-2),  $\delta_H$  2.28 (1H, ddd,  $J=14.2, 3.9, 2.5$  Hz, H-5a),  $\delta_H$  1.86 (1H, m, H-5b),  $\delta_H$  1.98 (1H, m, H-6a),  $\delta_H$  1.64 (1H, m, H-6b),  $\delta_H$  2.64 (1H, m, H-8),  $\delta_H$  1.73 (1H, m, H-9a),  $\delta_H$  1.62 (1H, m, H-9b),  $\delta_H$  1.92 (1H, m, H-10a),  $\delta_H$  1.49 (1H, m, H-10b),  $\delta_H$  1.50 (1H, m, H-11),  $\delta_H$  0.61 (3H, s, H-12),  $\delta_H$  2.06 (1H, dd,  $J=15.6, 8.7$  Hz, H-13),  $\delta_H$  1.04 (3H, d,  $J=6.6$  Hz, H-14),  $\delta_H$  5.17 (1H, d,  $J=15.3, 8.5$  Hz, H-15),  $\delta_H$  5.25 (1H, d,  $J=15.2, 7.9$  Hz, H-16),  $\delta_H$  1.98 (1H, m, H-17),  $\delta_H$  1.63 (1H, d,  $J=4.1$  Hz, H-18),  $\delta_H$  0.84 (3H, d,  $J=6.8$  Hz, H-19),  $\delta_H$  0.82 (3H, d,  $J=6.7$  Hz, H-20),  $\delta_H$  0.92 (3H, d,  $J=6.8$  Hz, H-21).  $^{13}C$  NMR (500 MHz,  $CDCl_3$ ):  $\delta_C$  171.0 (qC, C-1),  $\delta_C$  112.5 (CH, C-2),  $\delta_C$  170.6 (qC, C-3),  $\delta_C$  104.9 (qC, C-4),  $\delta_C$  35.4 (CH<sub>2</sub>, C-5),  $\delta_C$  29.0 (CH<sub>2</sub>, C-6),  $\delta_C$  49.0 (qC, C-7),  $\delta_C$  50.5 (CH, C-8),  $\delta_C$  21.5 (CH<sub>2</sub>, C-9),  $\delta_C$  35.1 (CH<sub>2</sub>, C-10),  $\delta_C$  55.5 (CH, C-11),  $\delta_C$  11.9 (CH<sub>3</sub>, C-12),  $\delta_C$  40.3 (CH, C-13),  $\delta_C$  19.8 (CH<sub>3</sub>, C-14),  $\delta_C$  133.0 (CH, C-15),  $\delta_C$  134.8 (CH, C-16),  $\delta_C$  42.9 (CH, C-17),  $\delta_C$  33.2 (CH, C-18),  $\delta_C$  20.1 (CH<sub>3</sub>, C-19),  $\delta_C$  21.2 (CH<sub>3</sub>, C-20),  $\delta_C$  17.7 (CH<sub>3</sub>, C-21).

**asperophiobolin E(7):** Orange powder; LRESIMS  $[M+H]^+$   $m/z$  383.8.  $[\alpha]^{25}_D +86.9$  (c 0.2 MeOH);  $^1H$  NMR (700 MHz,  $CDCl_3$ ):  $\delta_H$  1.13 (1H, dd,  $J=22.9, 9.8$  Hz, H-1a),  $\delta_H$  2.04 (1H, d,  $J=4.2$  Hz, H-1b),  $\delta_H$  2.84 (1H, d,  $J=12.8$  Hz, H-2),  $\delta_H$  5.93 (1H, s, H-4),  $\delta_H$  3.42 (1H, d,  $J=3.7$  Hz, H-6),  $\delta_H$  7.03 (1H, d,  $J=4.6$  Hz, H-8),  $\delta_H$  2.09 (1H, m, H-9a),  $\delta_H$  2.75 (1H, d,  $J=19.9$  Hz, H-9b),  $\delta_H$  2.54 (1H, dd,  $J=10.3, 3.4$  Hz, H-10), 1.42 (1H, td,  $J=12.4, 5.1$  Hz, H-12a),  $\delta_H$  1.51 (1H, dt,  $J=14.3, 7.2$  Hz, H-12b),  $\delta_H$  1.23 (1H, m, H-13a),  $\delta_H$  1.65 (1H, m, H-13b),  $\delta_H$  1.86 (1H, m, H-14),  $\delta_H$  2.56 (1H, dd,  $J=9.9, 3.0$  Hz, H-15),  $\delta_H$  5.09 (1H, t,  $J=10.1$  Hz, H-16),  $\delta_H$  6.08 (1H, t,  $J=11.2$  Hz, H-17),  $\delta_H$  5.99 (1H, t,  $J=11.6$  Hz, H-18),  $\delta_H$  2.07 (3H, s, H-20),  $\delta_H$  0.92 (3H, s, H-22),  $\delta_H$  0.95 (3H, s, H-23),  $\delta_H$  1.75 (3H, s, H-24),  $\delta_H$  1.81 (3H, s, H-25).  $^{13}C$  NMR (700 MHz,  $CDCl_3$ ):  $\delta_C$  46.2 (CH<sub>2</sub>, C-1),  $\delta_C$  49.5 (CH, C-2),  $\delta_C$  178.6 (qC, C-3),  $\delta_C$  129.8 (CH, C-4),  $\delta_C$  208.2 (qC, C-5),  $\delta_C$  51.4 (CH, C-6),  $\delta_C$  127.9 (qC, C-7),  $\delta_C$  148.1 (CH, C-8),  $\delta_C$  30.1 (CH<sub>2</sub>, C-9),  $\delta_C$  44.1 (CH, C-10),  $\delta_C$  45.5 (qC, C-11),  $\delta_C$  44.5 (CH<sub>2</sub>, C-12),  $\delta_C$  27.9 (CH<sub>2</sub>, C-13),  $\delta_C$  52.3 (CH, C-14),  $\delta_C$  32.6 (CH, C-15),  $\delta_C$  135.9 (CH, C-16),  $\delta_C$  124.1 (CH, C-17),  $\delta_C$  120.1 (CH, C-18),  $\delta_C$  136.5 (qC, C-19),  $\delta_C$  17.5 (CH<sub>3</sub>, C-20),  $\delta_C$  17.5 (CH<sub>3</sub>, C-20),  $\delta_C$  171.6 (qC, C-21),  $\delta_C$  23.0 (CH<sub>3</sub>, C-22),  $\delta_C$  21.4 (CH<sub>3</sub>, C-23),  $\delta_C$  18.3 (CH<sub>3</sub>, C-24),  $\delta_C$  26.7 (CH<sub>3</sub>, C-25).

**butyrolactone I (8):** Pale yellow oil; LRESIMS  $[M-H]^-$   $m/z$  423.1;  $[2M-H]^-$   $m/z$  847.1.  $[\alpha]^{25}_D +30.5$  (c 0.8 MeOH).  $^1H$  NMR (700 MHz, MeOH):  $\delta_H$  3.43 (2H, dd,  $J=31.1, 14.7$  Hz, H-5),  $\delta_H$  3.79 (3H, s, H-7),  $\delta_H$  7.59 (2H, m, H-2'/6'),  $\delta_H$  6.85 (2H, m, H-3'/5'),  $\delta_H$  6.49 (H, d,  $J=8.1$  Hz, H-2''),  $\delta_H$  6.41 (H, d,  $J=2.1$  Hz, H-5''),  $\delta_H$  6.54 (H, dd,  $J=8.2, 2.2$  Hz, H-6''),  $\delta_H$  3.08 (2H, m, H-7''),  $\delta_H$  5.07 (1H, m, H-8''),  $\delta_H$  1.67 (3H, s, H-10''),  $\delta_H$  1.58 (3H, s, H-11'').  $^{13}C$  NMR (700 MHz, MeOH):  $\delta_C$  168.9 (qC, C-1),  $\delta_C$  138.3 (qC, C-2),  $\delta_C$  127.8 (qC, C-3),  $\delta_C$  85.4 (qC, C-4),  $\delta_C$  38.2 (CH<sub>2</sub>, C-5),  $\delta_C$  170.2 (qC, C-6),  $\delta_C$  52.4 (OCH<sub>3</sub>, C-7),  $\delta_C$  121.8 (qC, C-1'),  $\delta_C$  128.9 (CH, C-2'/6'),  $\delta_C$  115.2 (CH, C-3'/5'),  $\delta_C$  157.9 (qC, C-4'),  $\delta_C$  123.7 (qC, C-1''),  $\delta_C$  131.0 (CH, C-2''),  $\delta_C$  127.0 (qC, C-3''),  $\delta_C$  153.7 (qC, C-4''),  $\delta_C$  113.6 (CH, C-5''),  $\delta_C$  128.4 (CH, C-6''),  $\delta_C$  27.3 (CH<sub>2</sub>, C-7''),  $\delta_C$  122.2 (CH, C-8''),  $\delta_C$  131.6 (qC, C-9''),  $\delta_C$  24.6 (CH<sub>3</sub>, C-10''),  $\delta_C$  16.4 (CH<sub>3</sub>, C-11'').

**butyrolactones VI (9):** Colorless solid; LRESIMS  $[M+H]^+$   $m/z$  459.8.  $[\alpha]^{25}_D +66.8$  (c 0.5 MeOH).  $^1H$  NMR (700 MHz, MeOH):  $\delta_H$  3.45 (2H, d,  $J=5.7$  Hz, H-5),  $\delta_H$  3.79 (3H, s, H-7),  $\delta_H$  7.58 (2H, m, H-2'/6'),  $\delta_H$  6.78 (2H, m, H-3'/5'),  $\delta_H$  6.52 (H, d,  $J=8.1$  Hz, H-2''),  $\delta_H$  6.50 (H, d,  $J=2.1$  Hz, H-5''),  $\delta_H$  6.62 (H, dd,  $J=8.2, 2.2$  Hz, H-6''),  $\delta_H$  2.69 (1H, dd,  $J=14.1, 2.1$  Hz, H-7''a),  $\delta_H$  2.55 (1H, dd,  $J=14.1, 10.0$  Hz, H-7''b),  $\delta_H$  3.44 (1H, t,  $J=3.7$  Hz, H-8''),  $\delta_H$  1.18 (3H, s, H-10''),  $\delta_H$  1.18 (3H, s, H-11'').  $^{13}C$  NMR (700 MHz, MeOH):  $\delta_C$  168.9 (qC, C-1),  $\delta_C$  138.3 (qC, C-2),  $\delta_C$  127.8 (qC, C-3),  $\delta_C$  85.4 (qC,

C-4),  $\delta_C$  38.2 (CH<sub>2</sub>, C-5),  $\delta_C$  170.2 (qC, C-6),  $\delta_C$  52.4 (OCH<sub>3</sub>, C-7),  $\delta_C$  121.7 (qC, C-1'),  $\delta_C$  129.1 (CH, C-2'/6'),  $\delta_C$  115.3 (CH, C-3'/5'),  $\delta_C$  157.9 (qC, C-4'),  $\delta_C$  124.1 (qC, C-1''),  $\delta_C$  132.9 (CH, C-2''),  $\delta_C$  127.9 (qC, C-3''),  $\delta_C$  154.5 (qC, C-4''),  $\delta_C$  114.5 (CH, C-5''),  $\delta_C$  129.0 (CH, C-6''),  $\delta_C$  32.6 (CH<sub>2</sub>, C-7''),  $\delta_C$  79.2 (CH, C-8''),  $\delta_C$  72.4 (qC, C-9''),  $\delta_C$  24.1 (CH<sub>3</sub>, C-10''),  $\delta_C$  23.7 (CH<sub>3</sub>, C-11'').

**epi-aszonalenins B (10):** White powder; LRESIMS [M+H]<sup>+</sup>  $m/z$  402.3 [ $\alpha$ ]<sup>25</sup>D -3.8 (c 0.1 MeOH). <sup>1</sup>H NMR (700 MHz, CDCl<sub>3</sub>):  $\delta_H$  8.03 (1H, s, H-9),  $\delta_H$  7.59 (1H, d,  $J$ =8.0 Hz, H-10),  $\delta_H$  7.57 (1H, dd,  $J$ =8.5, 5.8 Hz, H-11),  $\delta_H$  6.89 (1H, d,  $J$ =5.8 Hz, H-12),  $\delta_H$  3.45 (3H, s, H-13),  $\delta_H$  1.92 (3H, s, H-14),  $\delta_H$  1.92 (3H, s, H-15),  $\delta_H$  4.25 (2H, s, H-17),  $\delta_H$  2.37 (3H, s, H-19). <sup>1</sup>C NMR (500 MHz, CDCl<sub>3</sub>):  $\delta_C$  164.8 (qC, C-2),  $\delta_C$  125.6 (qC, C-3),  $\delta_C$  126.4 (qC, C-3a),  $\delta_C$  125.6 (qC, C-4),  $\delta_C$  165.0 (qC, C-5),  $\delta_C$  66.0 (qC, C-7),  $\delta_C$  152.7 (qC, C-8),  $\delta_C$  123.2 (CH, C-9),  $\delta_C$  132.3 (qC, C-9a),  $\delta_C$  120.2 (CH, C-10),  $\delta_C$  131.5 (CH, C-11),  $\delta_C$  105.0 (CH, C-12),  $\delta_C$  141.6 (qC, C-12a),  $\delta_C$  26.5 (CH<sub>3</sub>, C-13),  $\delta_C$  26.8 (CH<sub>3</sub>, C-14),  $\delta_C$  26.8 (CH<sub>3</sub>, C-15),  $\delta_C$  167.8 (qC, C-16),  $\delta_C$  54.1 (CH<sub>2</sub>, C-17),  $\delta_C$  201.7 (qC, C-18),  $\delta_C$  30.4 (CH<sub>3</sub>, C-20),  $\delta_C$  30.4 (CH<sub>3</sub>, C-22),  $\delta_C$  30.4 (CH<sub>3</sub>, C-23),  $\delta_C$  30.4 (CH<sub>3</sub>, C-24),  $\delta_C$  30.4 (CH<sub>3</sub>, C-25),  $\delta_C$  30.4 (CH<sub>3</sub>, C-26).

**Flavoglaucin (11):** Yellow liquid; LRESIMS [M+H]<sup>+</sup>  $m/z$  305.2. [ $\alpha$ ]<sup>25</sup>D -2.04 (c 0.2 MeOH). <sup>1</sup>H NMR (700 MHz, CDCl<sub>3</sub>):  $\delta_H$  10.3 (1H, s, CHO-1),  $\delta_H$  6.89 (1H, s, H-4),  $\delta_H$  2.88 (1H, m, H-1'),  $\delta_H$  1.57 (2H, ddd,  $J$ =15.6, 8.9, 6.8 Hz, H-2'),  $\delta_H$  1.39 (2H, qt,  $J$ =15.2, 7.1 Hz, H-3'),  $\delta_H$  1.32 (2H, m, H-4'),  $\delta_H$  1.27 (2H, m, H-5'),  $\delta_H$  1.28 (2H, m, H-6'),  $\delta_H$  0.88 (3H, t,  $J$ =7.1 Hz, H-7'),  $\delta_H$  3.29 (2H, d,  $J$ =7.4 Hz, H-1''),  $\delta_H$  5.28 (1H, m, H-2''),  $\delta_H$  1.76 (3H, s, H-4''),  $\delta_H$  1.70 (3H, s, H-5''),  $\delta_H$  11.9 (1H, s, OH-2),  $\delta_H$  4.47 (1H, s, OH-5). <sup>1</sup>C NMR (500 MHz, CDCl<sub>3</sub>):  $\delta_C$  195.6 (CH, CHO-1),  $\delta_C$  117.3 (qC, C-1),  $\delta_C$  155.8 (qC, C-2),  $\delta_C$  128.6 (qC, C-3),  $\delta_C$  125.7 (CH, C-4),  $\delta_C$  145.0 (qC, C-5),  $\delta_C$  128.6 (qC, C-6),  $\delta_C$  24.0 (CH<sub>2</sub>, C-1'),  $\delta_C$  32.0 (CH<sub>2</sub>, C-2'),  $\delta_C$  29.6 (CH<sub>2</sub>, C-3'),  $\delta_C$  29.2 (CH<sub>2</sub>, C-4'),  $\delta_C$  31.8 (CH<sub>2</sub>, C-5'),  $\delta_C$  22.7 (CH<sub>2</sub>, C-6'),  $\delta_C$  14.1 (CH<sub>2</sub>, C-7'),  $\delta_C$  27.0 (CH<sub>2</sub>, C-1''),  $\delta_C$  121.2 (CH, C-2''),  $\delta_C$  133.9 (qC, C-3''),  $\delta_C$  25.8 (CH<sub>3</sub>, C-4''),  $\delta_C$  17.8 (CH<sub>3</sub>, C-5'').

**6,8-Dimethoxy-3-methylisocoumar (12):** Orange powder; LRESIMS [M+H]<sup>+</sup>  $m/z$  223.5. [ $\alpha$ ]<sup>25</sup>D -89.3 (c 0.1 MeOH). <sup>1</sup>H NMR (700 MHz, MeOH):  $\delta_H$  4.45 (1H, ddd,  $J$ =11.4, 6.3, 2.9 Hz, H-3),  $\delta_H$  2.85 (1H, dd,  $J$ =16.2, 11.4 Hz, H-4),  $\delta_H$  2.94 (1H, dd,  $J$ =16.3, 2.8 Hz, H-4),  $\delta_H$  6.55 (1H, d,  $J$ =2.2 Hz, H-5),  $\delta_H$  6.48 (1H, d,  $J$ =2.2 Hz, H-7),  $\delta_H$  1.44 (3H, d,  $J$ =6.3 Hz, H-9),  $\delta_H$  3.88 (3H, s, H-10),  $\delta_H$  3.88 (3H, s, H-11). <sup>1</sup>C NMR (500 MHz, CDCl<sub>3</sub>):  $\delta_C$  164.8 (qC, C-2),  $\delta_C$  125.6 (qC, C-3),  $\delta_C$  126.4 (qC, C-3a),  $\delta_C$  125.6 (qC, C-4),  $\delta_C$  165.0 (qC, C-5),  $\delta_C$  66.0 (qC, C-7),  $\delta_C$  152.7 (qC, C-8),  $\delta_C$  123.2 (CH, C-9),  $\delta_C$  132.3 (qC, C-9a),  $\delta_C$  120.2 (CH, C-10),  $\delta_C$  131.5 (CH, C-11),  $\delta_C$  105.0 (CH, C-12),  $\delta_C$  141.6 (qC, C-12a),  $\delta_C$  26.5 (CH<sub>3</sub>, C-13),  $\delta_C$  26.8 (CH<sub>3</sub>, C-14),  $\delta_C$  26.8 (CH<sub>3</sub>, C-15),  $\delta_C$  167.8 (qC, C-16),  $\delta_C$  54.1 (CH<sub>2</sub>, C-17),  $\delta_C$  201.7 (qC, C-18),  $\delta_C$  30.4 (CH<sub>3</sub>, C-19).

**methyl shikimate (13):** Yellow liquid; HRESIMS [M+H]<sup>+</sup>  $m/z$  189.1560. [ $\alpha$ ]<sup>25</sup>D -1.38 (c 0.2 MeOH). <sup>1</sup>H NMR (700 MHz, DMSO):  $\delta_H$  6.48 (1H, m, H-2),  $\delta_H$  4.17 (1H, d,  $J$ =1.6 Hz, H-3),  $\delta_H$  3.74 (1H, s, H-4),  $\delta_H$  3.61 (1H, m, H-5),  $\delta_H$  2.15 (1H, m, H-6a),  $\delta_H$  2.29 (1H, dd,  $J$ =16.8, 5.8 Hz, H-6b),  $\delta_H$  3.65 (3H, s, H-8),  $\delta_H$  4.87 (1H, d,  $J$ =7.4 Hz, OH-3),  $\delta_H$  4.58 (1H, d,  $J$ =3.5 Hz, OH-4),  $\delta_H$  4.76 (1H, d,  $J$ =5.4 Hz, OH-5). <sup>1</sup>C NMR (700 MHz, DMSO):  $\delta_C$  127.8 (qC, C-1),  $\delta_C$  140.8 (CH, C-2),  $\delta_C$  68.3 (CH, C-3),  $\delta_C$  70.9 (CH, C-4),  $\delta_C$  67.6 (CH, C-5),  $\delta_C$  29.0 (CH<sub>2</sub>, C-6),  $\delta_C$  166.7 (qC, C-7),  $\delta_C$  51.8 (CH<sub>3</sub>, C-8).

**The strain's (*Aspergillus hiratsukae* SCSIO 5Bn<sub>1</sub>003) ITS sequence of the rDNA**  
TCAACCTCCCACCCGTGTCTATTGTACCTTGTTGCTTCGGCGGGCCCCGCCG  
TTTTCGAACGGCCGCCGGGGAGGCCTCGCGCCCCCGGGCCCGCGCCCCGCC

GAAGACCCCAACATGAACGCTGTTCTGAAAGTATGCAGTCTGAGTTTGAT  
TATCATAATCAGTTAAACTTTCAACAACGGATCTCTTGGTTCCGGCATCG  
ATGAAGAACGCAGCGAAATGCGATAAGTAATGTGAATTGCAGAATTCAGT  
GAATCATCGAGTCTTTGAACGCACATTGCGCCCCCTGGTATTCCGGGGGG  
CATGCCTGTCCGAGCGTCATTGCTGCCCTCAAGCACGGCTTGTGTGTTGGG  
CCCCCGTCCCCGGTTCTCCCCGGGGACGGGCCCCGAAAGGCAGCGGCGGCA  
CCGCGTCCGATCCTCGAGCGTATGGGGCTTTGTCACCCGCTCTGTAGGCCC  
GGCCGGCGCCAGCCGACACCCCAACTTTATTTTTCTAAGGTTGACCTCGGA  
TCAGGTAGGGATACCCGCTGAACTTAAGCATATCAATAA

**Table S1. the primary screening of cytotoxic activity of all compounds.**

| compounds | Inhibition rate (50 $\mu$ M) % |       |        |       |
|-----------|--------------------------------|-------|--------|-------|
|           | SF-268                         | MCF-7 | HepG-2 | A549  |
| 1         | 0.82                           | 1.03  | 0.38   | 4.40  |
| 2         | 1.43                           | 1.01  | 1.45   | 1.21  |
| 3         | 2.31                           | 3.24  | 0.13   | 0.83  |
| 4         | 8.79                           | 19.08 | 1.57   | 8.60  |
| 5         | 4.58                           | 5.62  | 3.52   | 2.97  |
| 6         | 93.24                          | 92.20 | 81.44  | 0.41  |
| 7         | 9.64                           | 38.75 | 40.71  | 0.58  |
| 8         | 41.92                          | 50.70 | 69.11  | 21.53 |
| 9         | 8.47                           | 17.74 | 5.43   | 0.29  |
| 10        | 32.90                          | 42.17 | 6.70   | 0.73  |
| 11        | 0.81                           | 0.49  | 0.39   | 1.53  |
| 12        | 4.43                           | 6.09  | 2.34   | 2.91  |
| 13        | 0.59                           | 0.66  | 0.66   | 0.36  |

**Table S2. the primary screening of antibacterial activities of all compounds.**

| compounds | Inhibition rate (50 $\mu$ M) % |                          |
|-----------|--------------------------------|--------------------------|
|           | <i>Staphylococcus aureus</i>   | <i>Bacillus subtilis</i> |
| 1         | 5.22                           | 3.87                     |
| 2         | 4.34                           | 0.67                     |
| 3         | 7.98                           | 9.17                     |
| 4         | 19.38                          | 5.23                     |
| 5         | 11.80                          | 8.18                     |
| 6         | 29.44                          | 79.64                    |
| 7         | 82.36                          | 94.33                    |
| 8         | 84.36                          | 91.28                    |
| 9         | 19.65                          | 3.76                     |
| 10        | 12.62                          | 0.30                     |
| 11        | 12.97                          | 17.50                    |
| 12        | 9.43                           | 2.16                     |
| 13        | 11.78                          | 7.69                     |

**Table S3. the primary screening of antioxidative and  $\alpha$ -glucosidase inhibitory activities of all compounds.**

| compounds | Inhibition rate (100 $\mu$ M) % |                                  |
|-----------|---------------------------------|----------------------------------|
|           | antioxidative activity          | $\alpha$ -Glucosidase Inhibitory |
| 1         | 4.30                            | 40.90                            |
| 2         | 1.60                            | 31.00                            |
| 3         | 2.00                            | 22.00                            |
| 4         | 2.80                            | 14.40                            |
| 5         | 1.90                            | 14.40                            |
| 6         | 1.00                            | 77.90                            |
| 7         | 3.60                            | 5.00                             |
| 8         | 2.50                            | 73.30                            |
| 9         | 0.60                            | 37.90                            |
| 10        | 0.40                            | 39.30                            |
| 11        | 18.20                           | 18.00                            |
| 12        | 5.50                            | 28.30                            |
| 13        | 32.90                           | 9.00                             |
